# Supplementary material for: NPRL2 gene therapy induces effective antitumor immunity in KRAS/STK11 mutant anti-PD1 resistant metastatic non-small cell lung cancer (NSCLC) in a humanized mouse model
Source: eLife journal article supplement (doi:10.7554/elife.98258), 2024-07-09

Figure 1A-source data 1:

PDF of original western blots for Figure 1A, indicating the relevant bands and samples

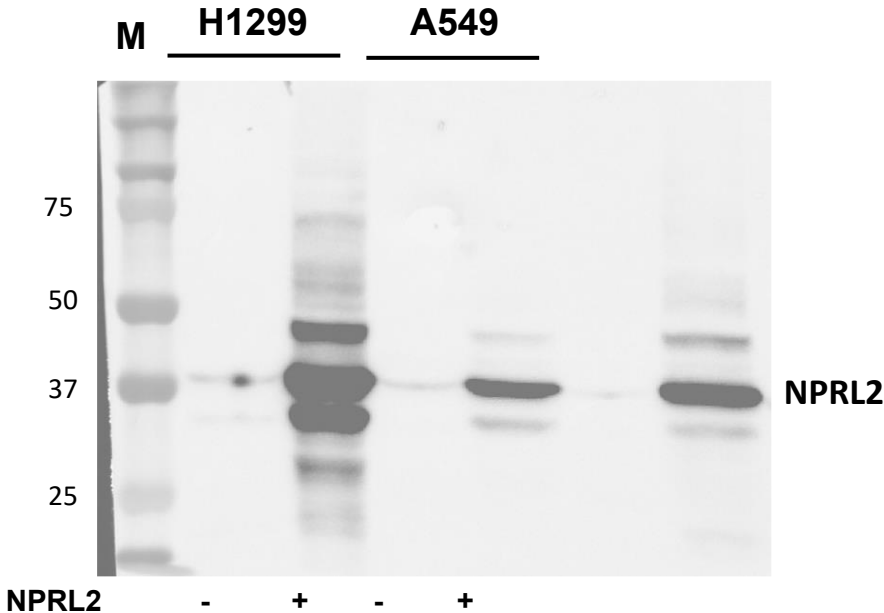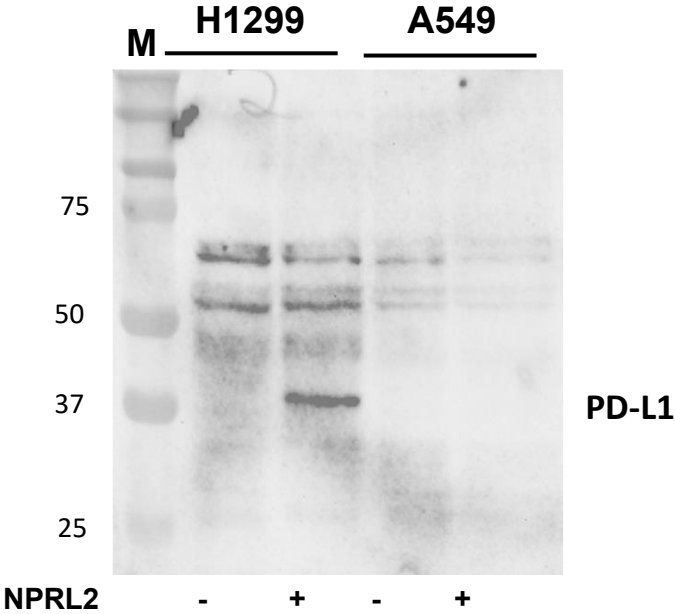

Supplement: fig1-data2 [file elife-98258-fig1-data2-v1.pdf]
