# Supplementary material for: NPRL2 gene therapy induces effective antitumor immunity in KRAS/STK11 mutant anti-PD1 resistant metastatic non-small cell lung cancer (NSCLC) in a humanized mouse model
Source: eLife journal article supplement (doi:10.7554/elife.98258), 2024-07-09
Supplement: fig1-figsupp1-data1 [file elife-98258-fig1-figsupp1-data1-v1.pdf]

# Figure 1-figure supplement 1-source data 1

PDF file containing original western blots for Figure 1-figure supplement 1, indicating the NPRL2 expressions in different NSCLC cell lines

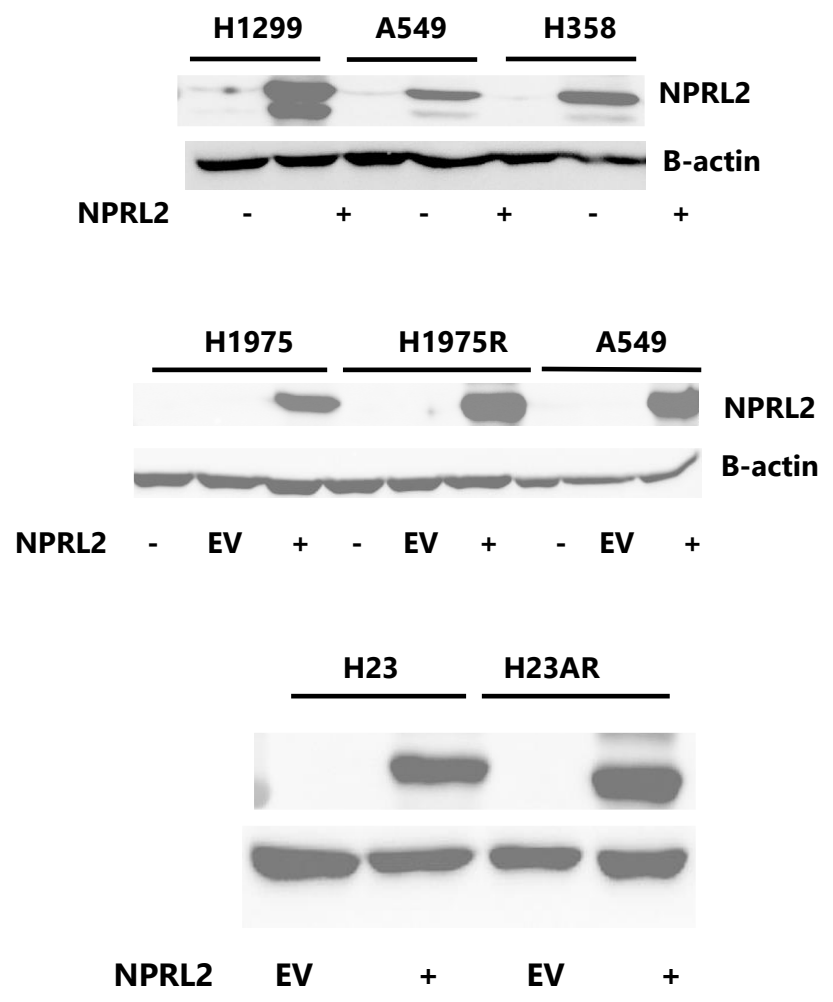

Figure 1-figure supplement 1. Basal level of NPRL2 expression and its transfection on various NSCLC cell lines

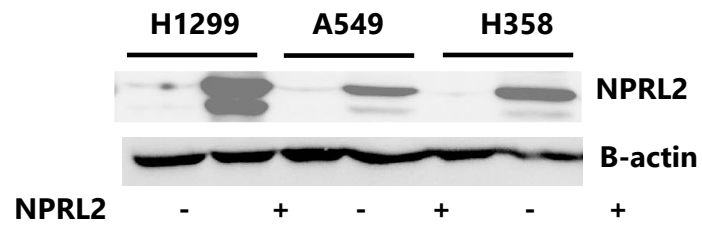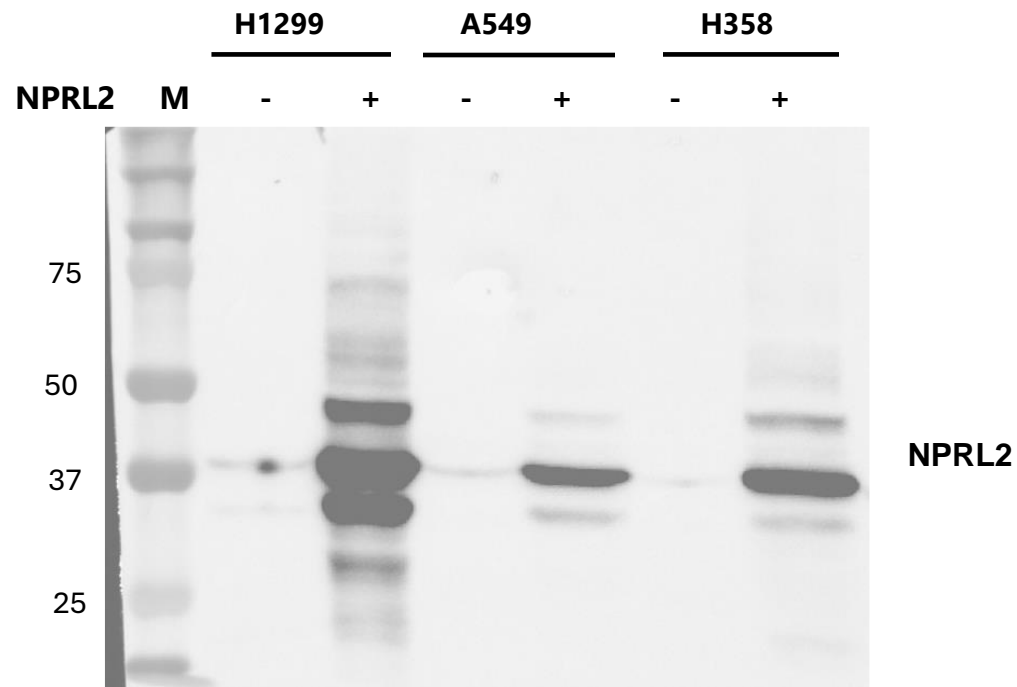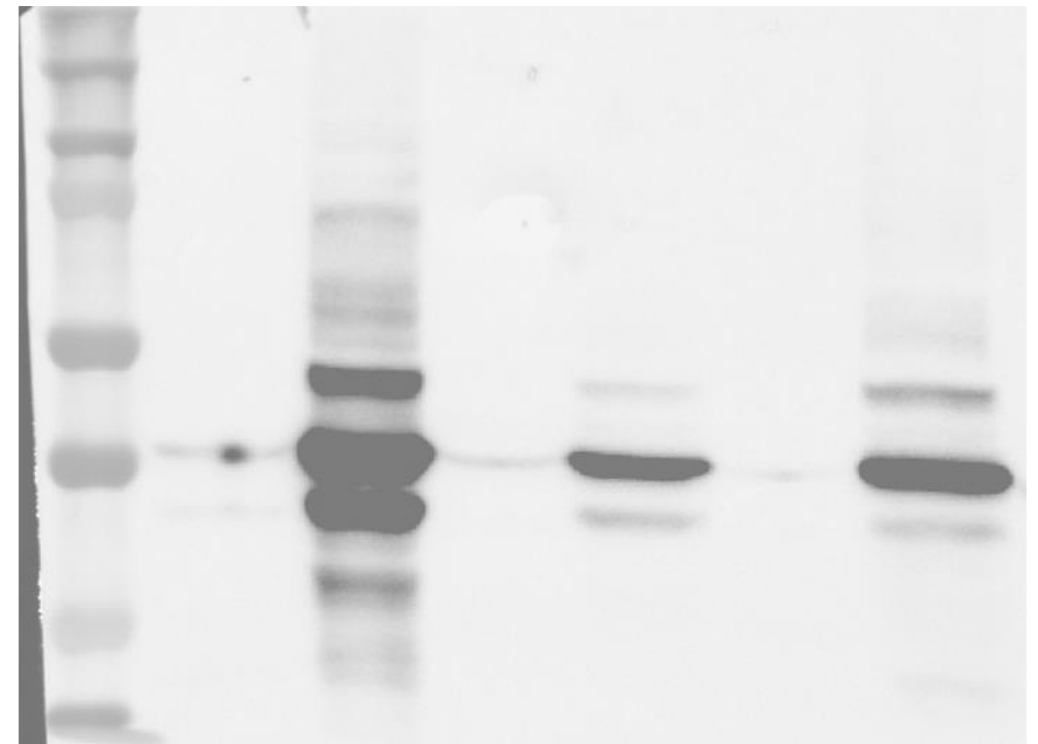

Figure 1-figure Supplement 1-source data 1. Basal level of NPRL2 expression and its transfection on various NSCLC cell lines

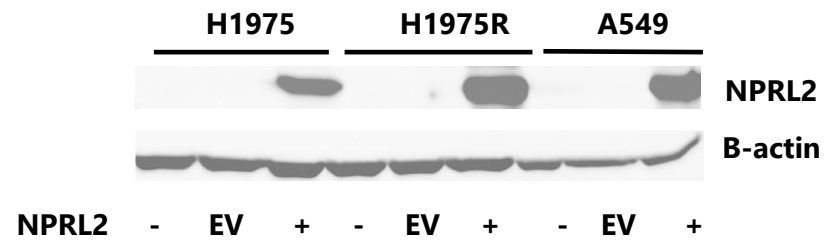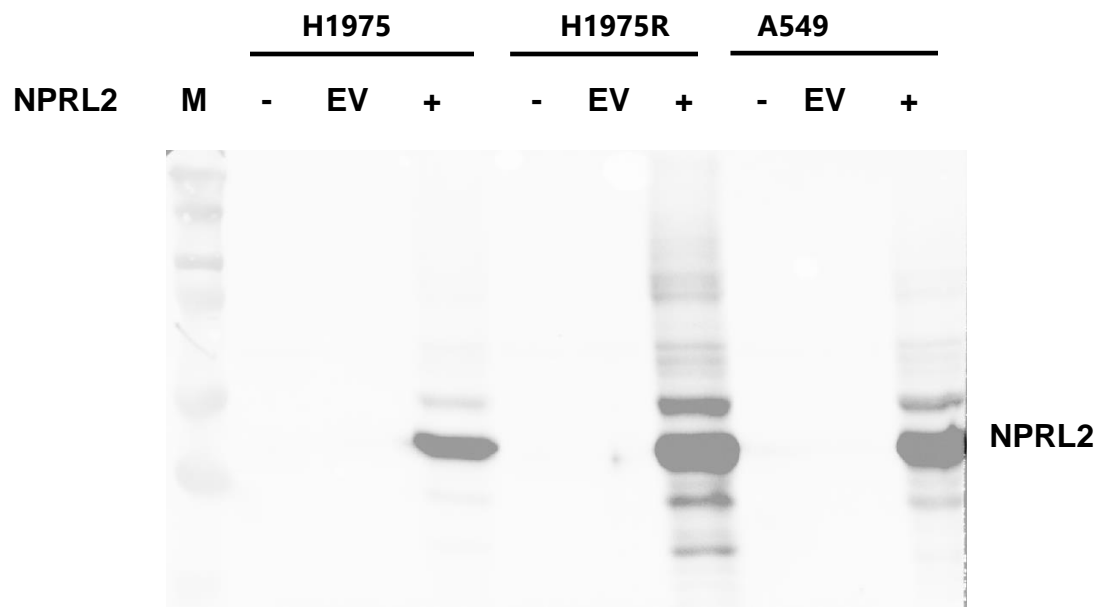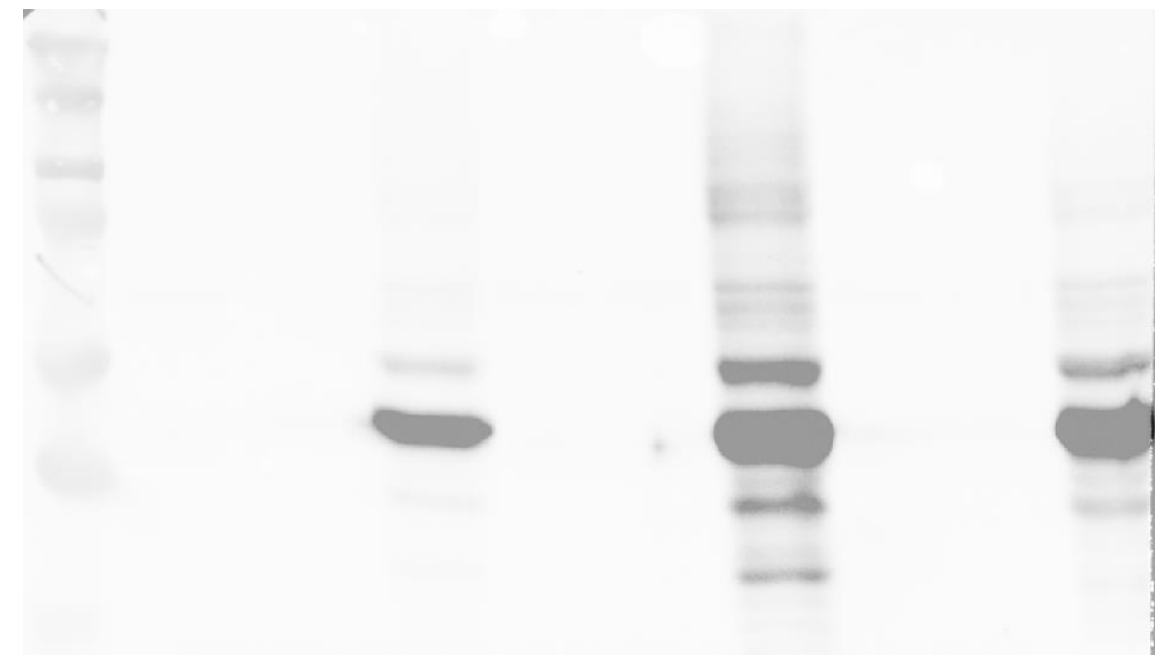

Figure 1-figure Supplement 1-source data 1. Basal level of NPRL2 expression and its transfection on various NSCLC cell lines

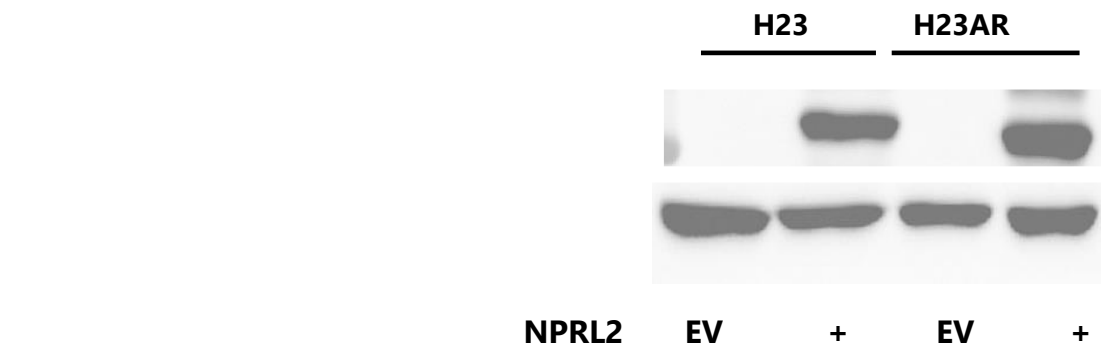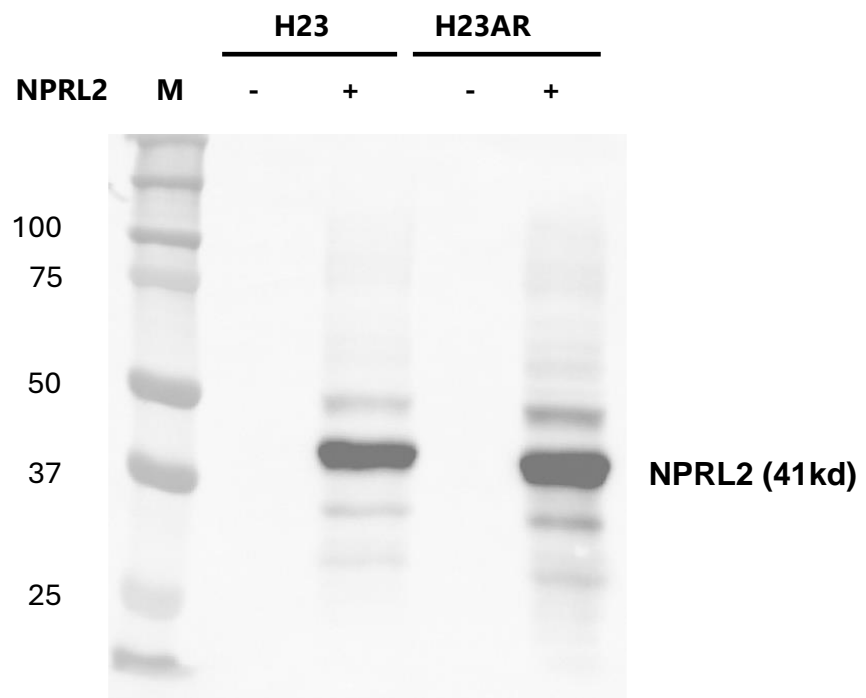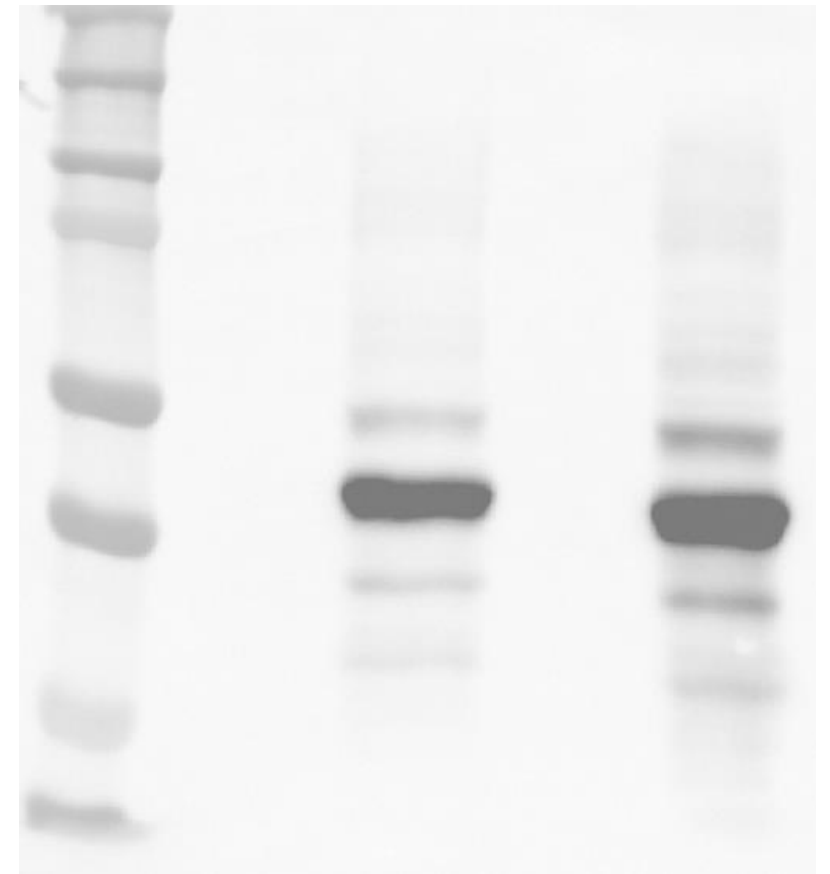

Figure 1-figure Supplement 1-source data 1. Basal level of NPRL2 expression and its transfection on various NSCLC cell lines
