# Supplementary material for: NPRL2 gene therapy induces effective antitumor immunity in KRAS/STK11 mutant anti-PD1 resistant metastatic non-small cell lung cancer (NSCLC) in a humanized mouse model
Source: eLife journal article supplement (doi:10.7554/elife.98258), 2024-07-09
Supplement: fig8-data2 [file elife-98258-fig8-data2-v1.pdf]

# Figure 8-source data 1

PDF file containing original western blots for figure 8R and figure 8S, indicating relevant bands, treatments and samples

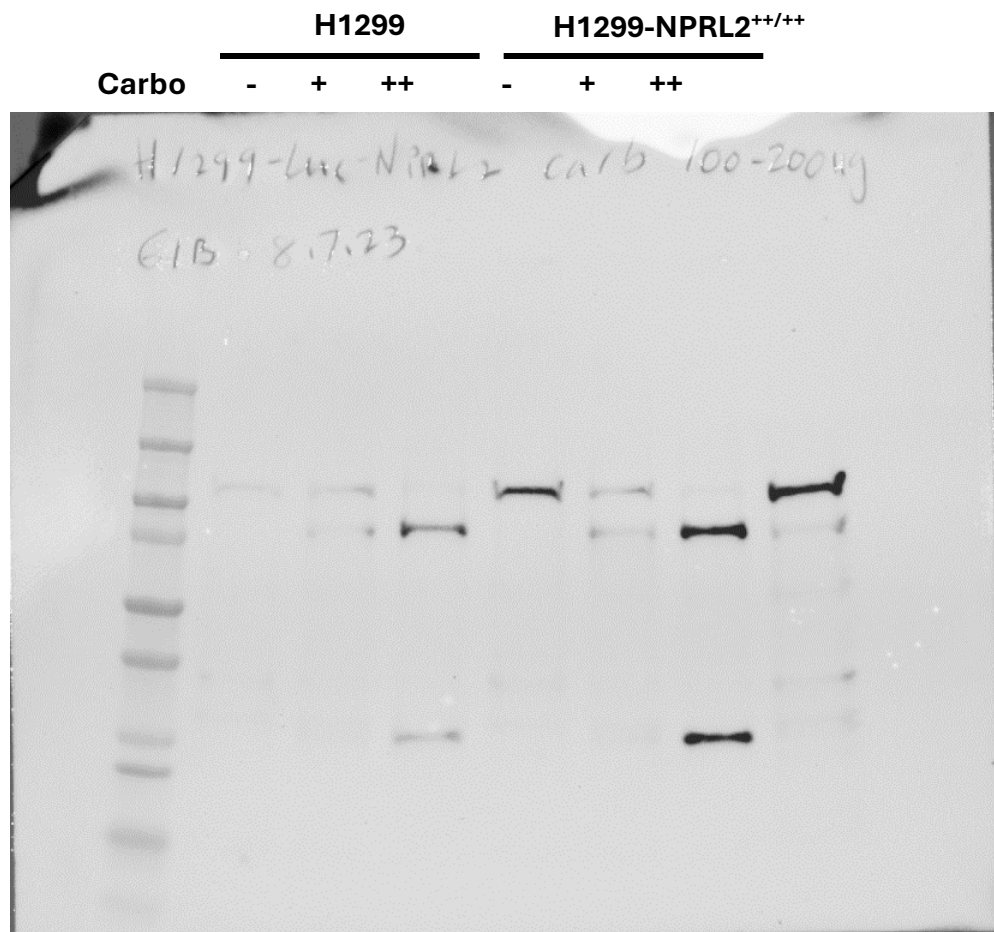

PARP Cleavage

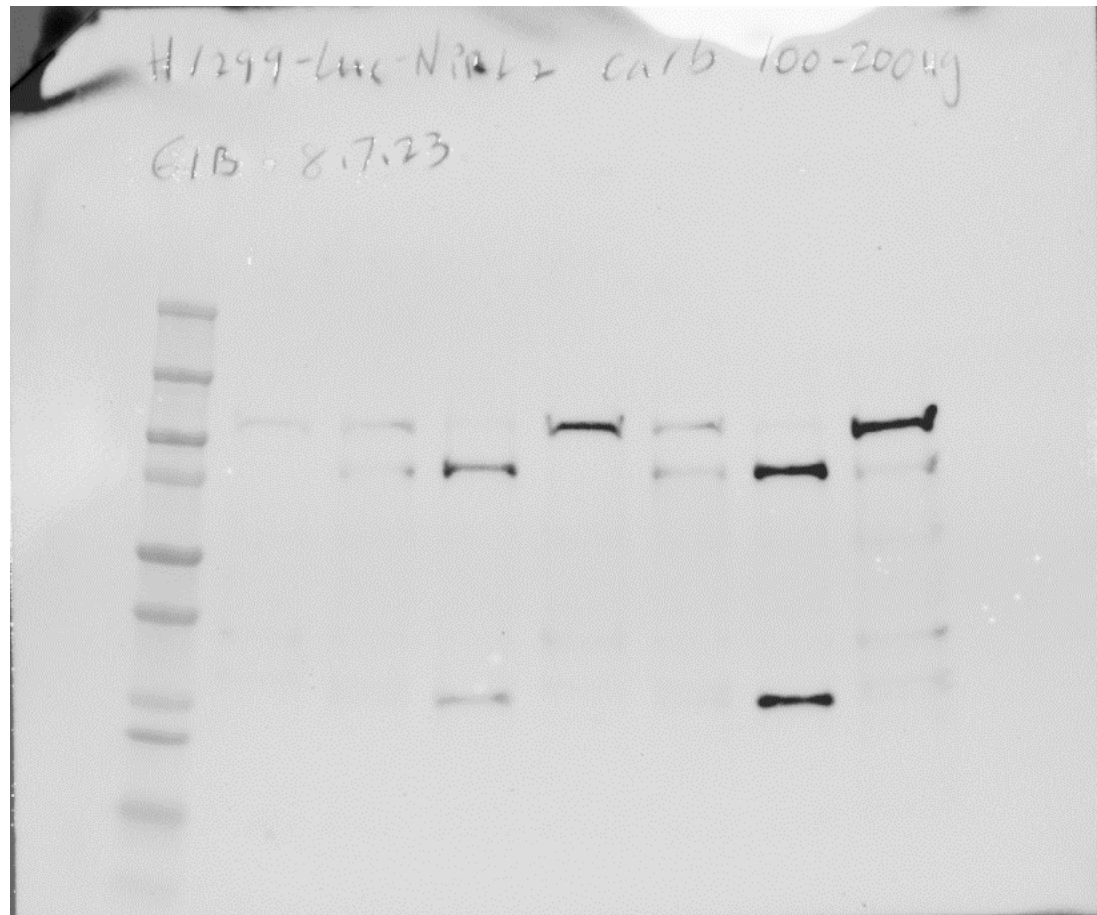

Figure 8-source data 1: PDF file containing original western blots for Figure 8R, indicating the relevant bands and samples

H1299                      H1299-NPRL2<sup>+/+</sup>

Carbo    -    +    ++    -    +    ++

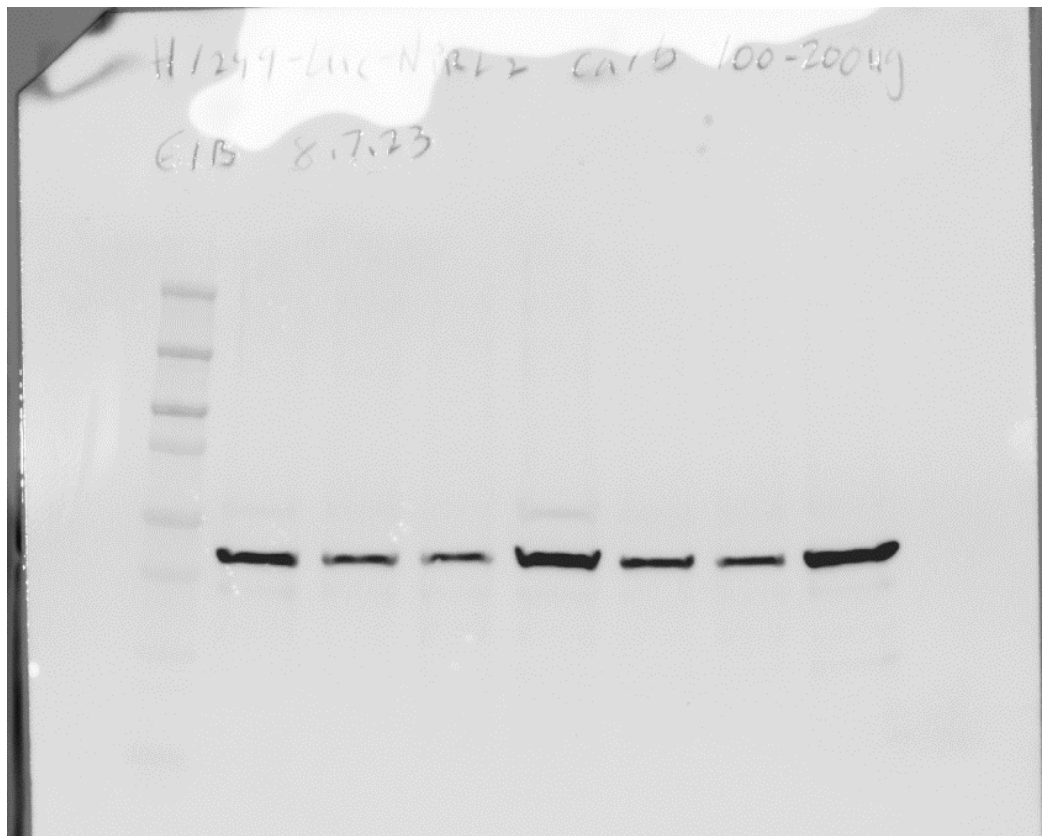

$\beta$ -actin

Figure 8-source data 1: PDF file containing original western blots for Figure 8R, indicating the relevant bands and samples

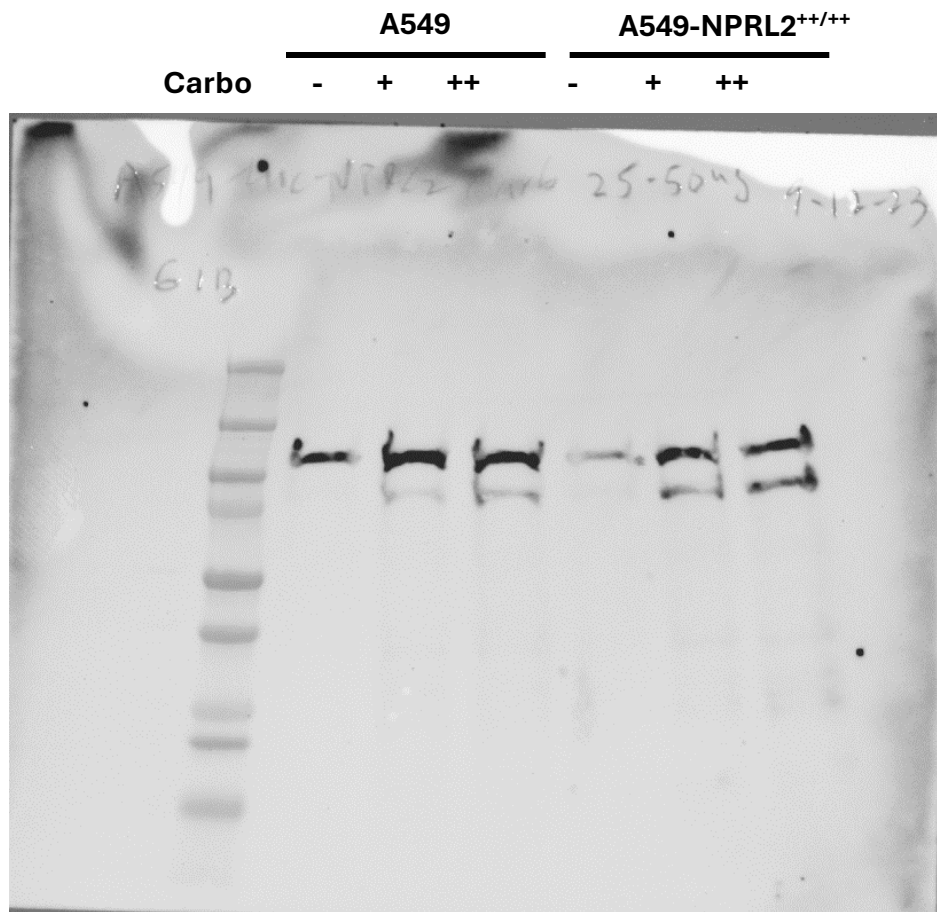

PARP Cleavage

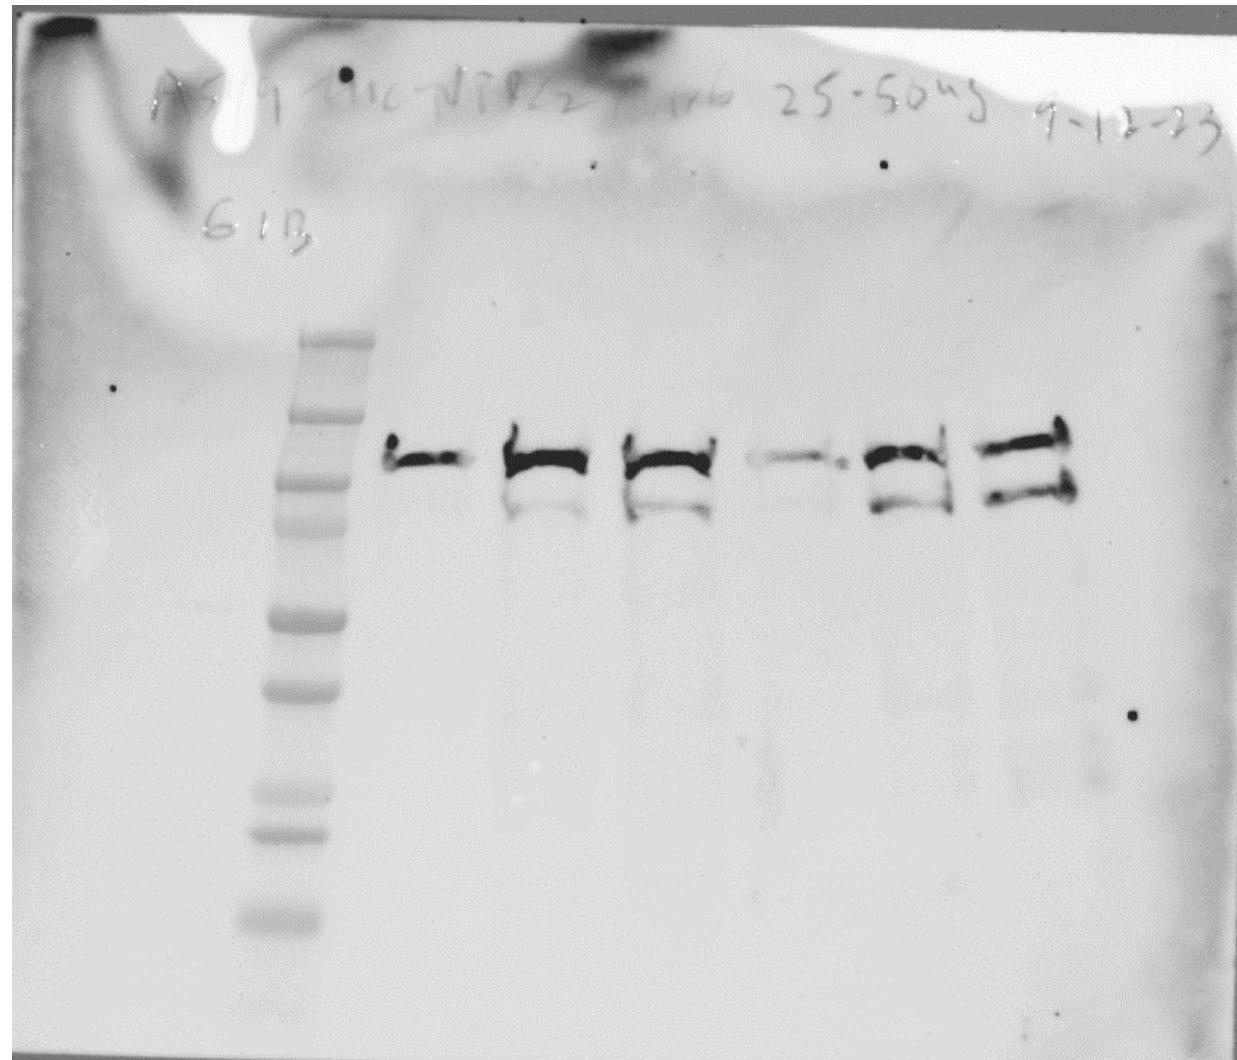

Figure 8-source data 1: PDF file containing original western blots for Figure 8R, indicating the relevant bands and samples

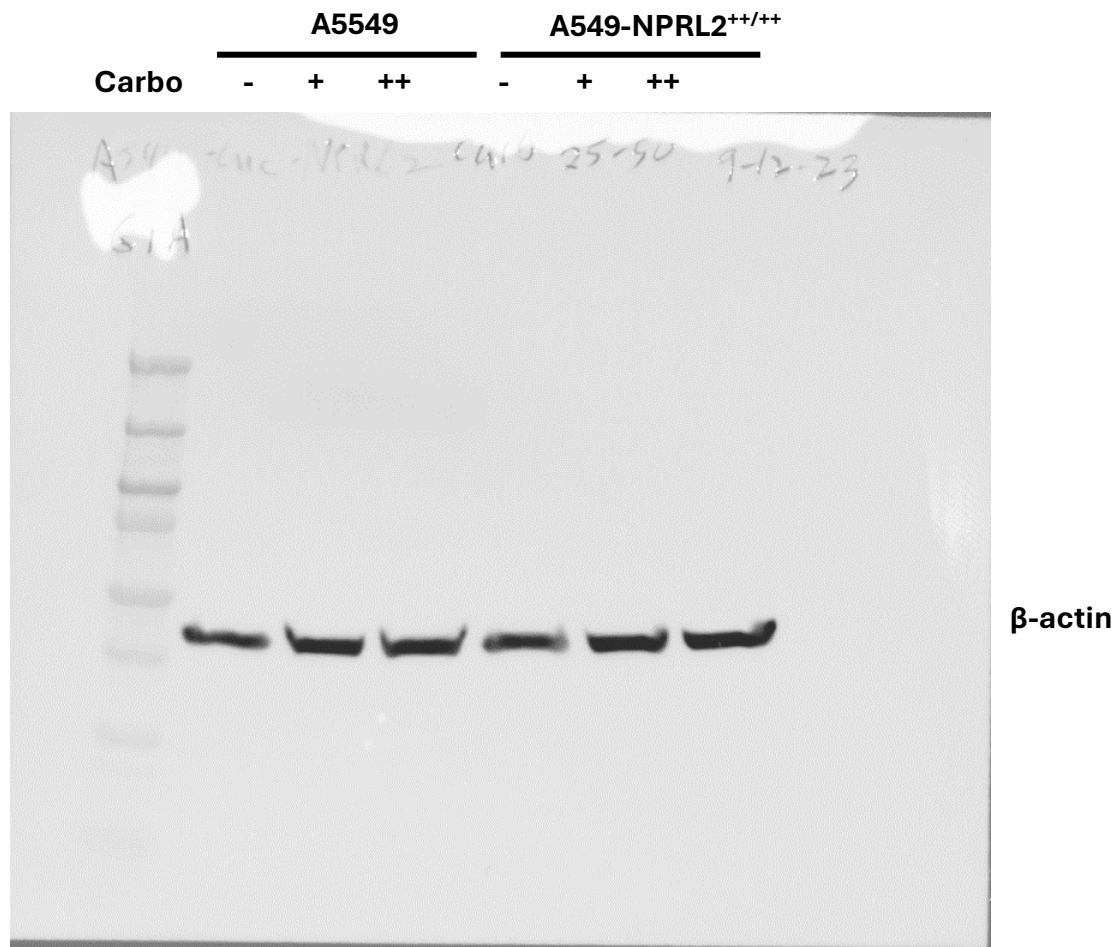

Figure 8-source data 1: PDF file containing original western blots for Figure 8R, indicating the relevant bands and samples

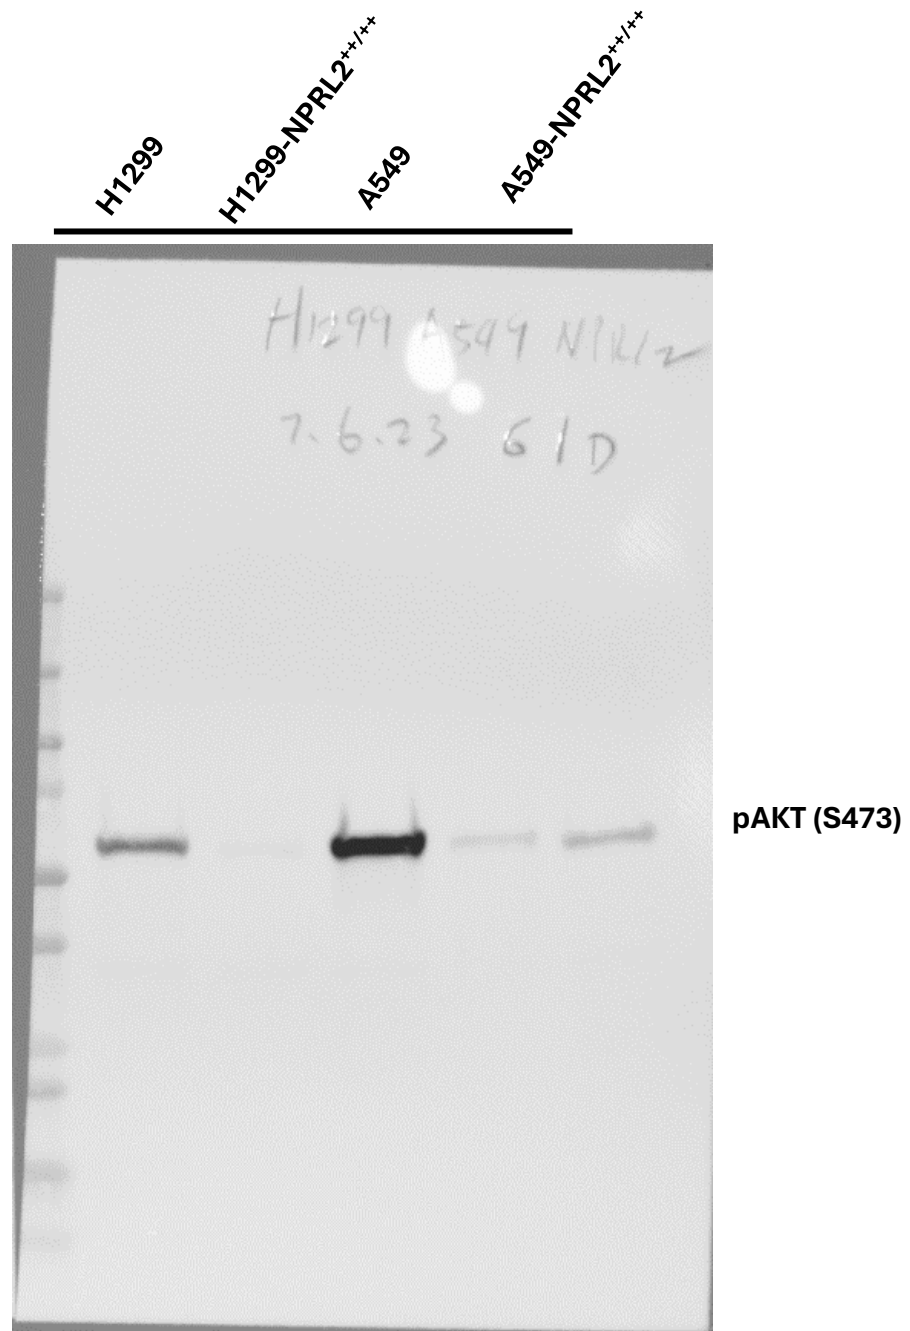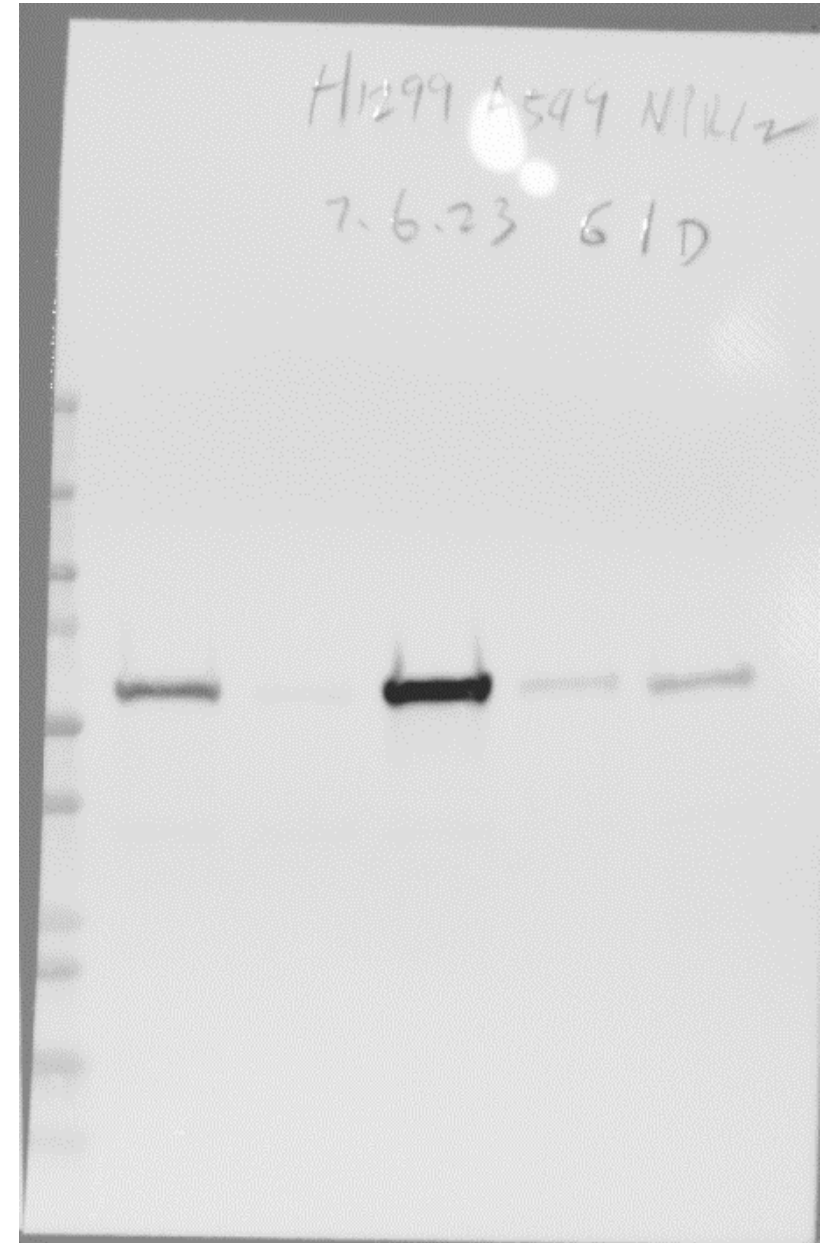

Figure 8-source data 1: PDF file containing original western blots for Figure 8S, indicating the relevant bands and samples

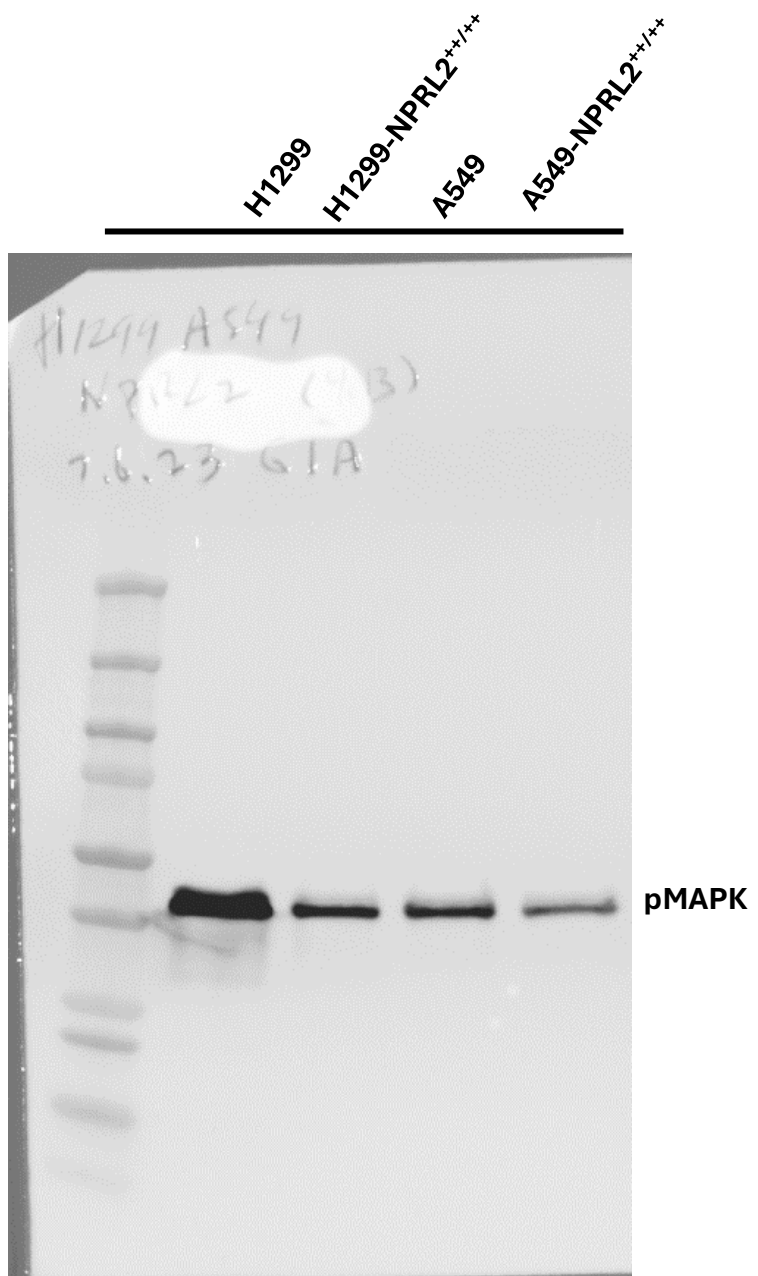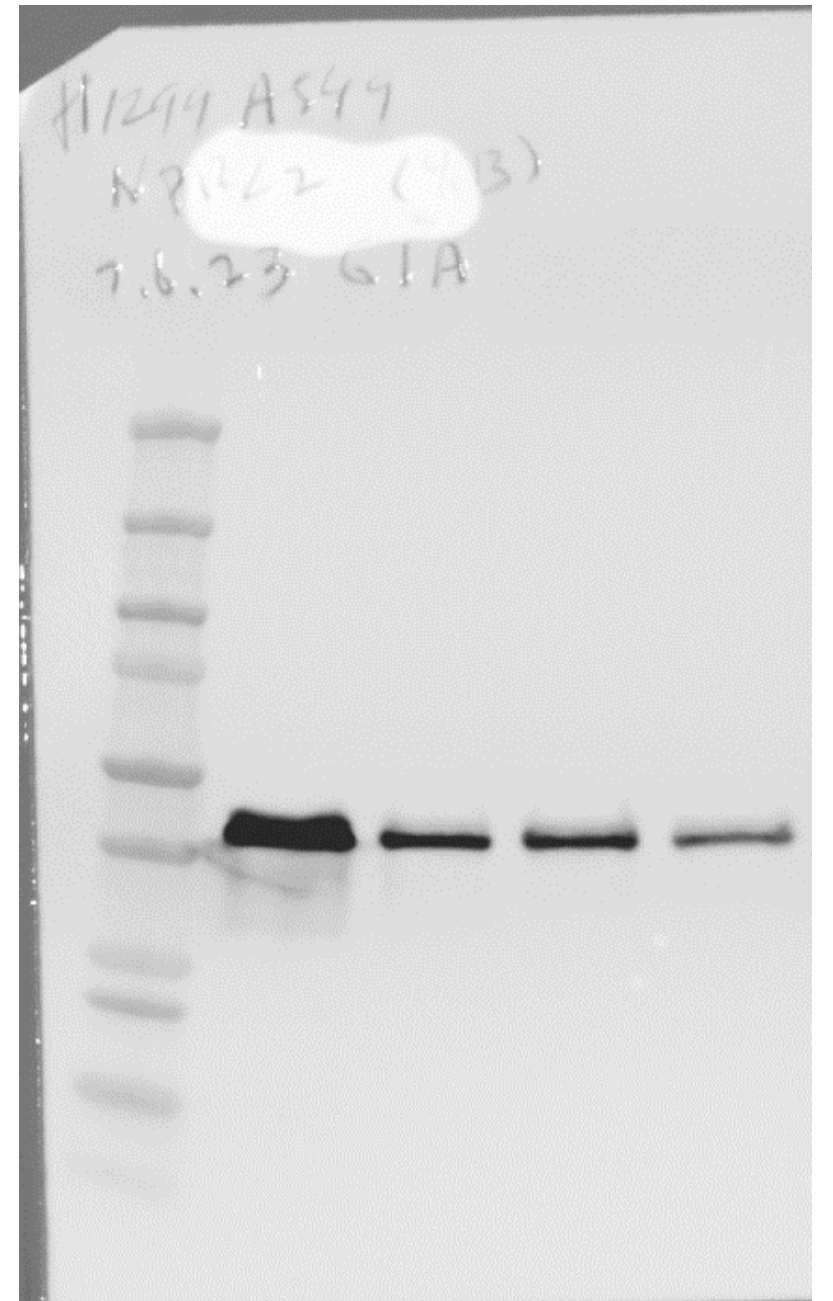

Figure 8-source data 1: PDF file containing original western blots for Figure 8S, indicating the relevant bands and samples

H1299 H1299-NPRL2<sup>+/+</sup> A549 A549-NPRL2<sup>+/+</sup>

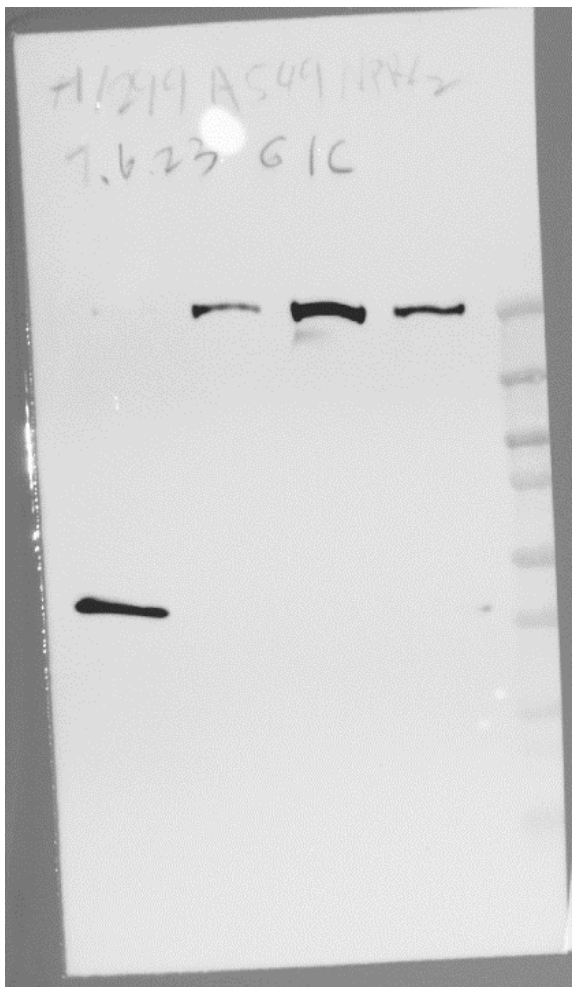

pmTOR

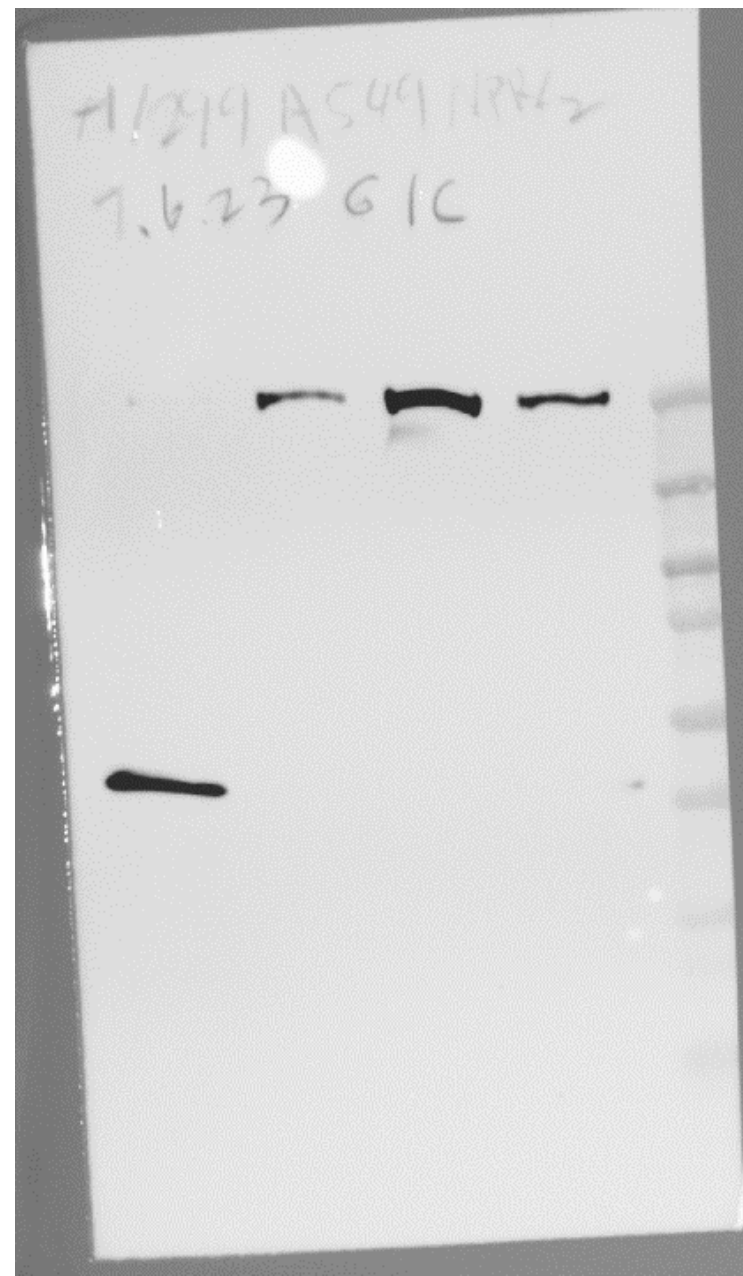

Figure 8-source data 1: PDF file containing original western blots for Figure 8S, indicating the relevant bands and samples



H1299  
H1299-NPRL2<sup>+/+</sup>  
A549

A549-NPRL2<sup>+/+</sup>

H1299

H1299-NPRL2<sup>+/+</sup>  
A549

A549-NPRL2<sup>+/+</sup>

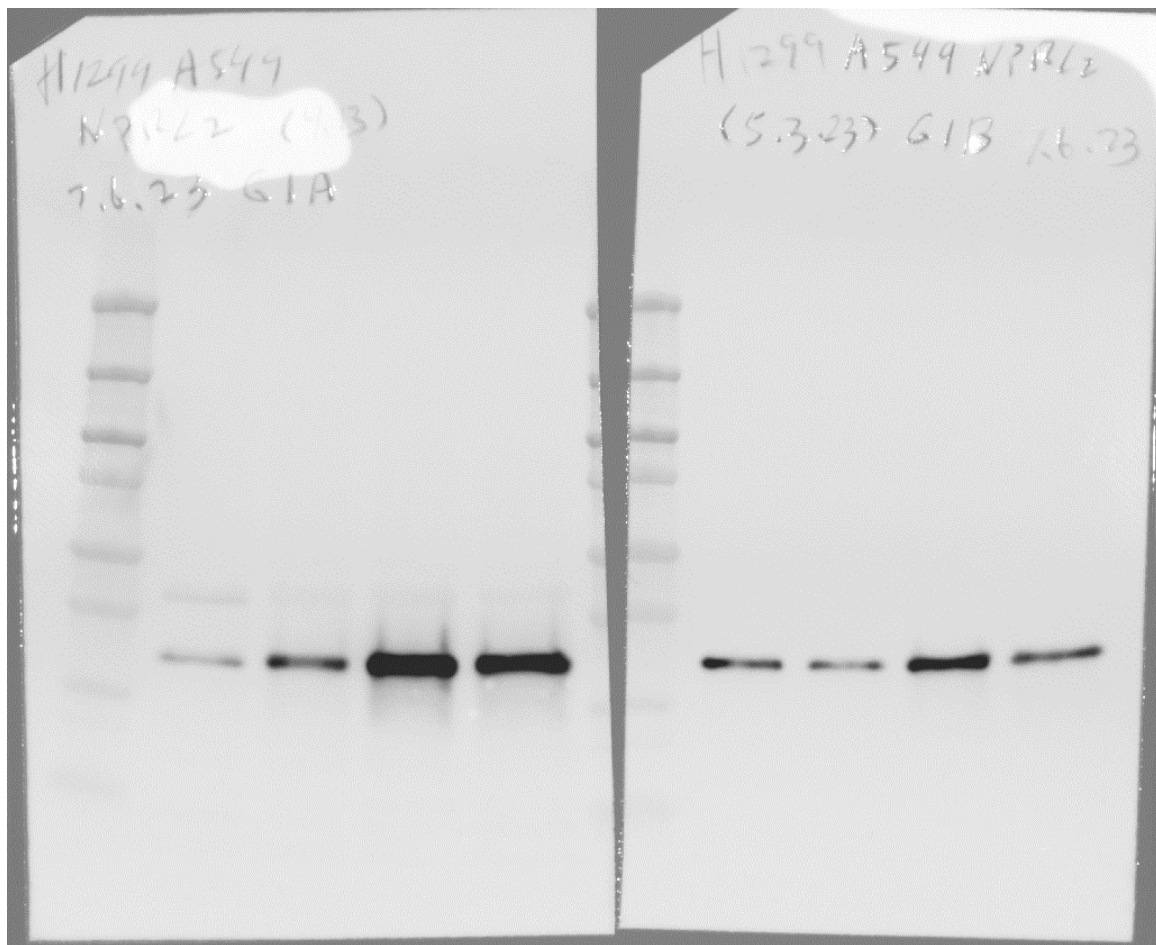

Figure 8-source data 1: PDF file containing original western blots for Figure 8S, indicating the relevant bands and samples

H1299

H1299-NPRL2<sup>+/+</sup>

A549

A549-NPRL2<sup>+/+</sup>

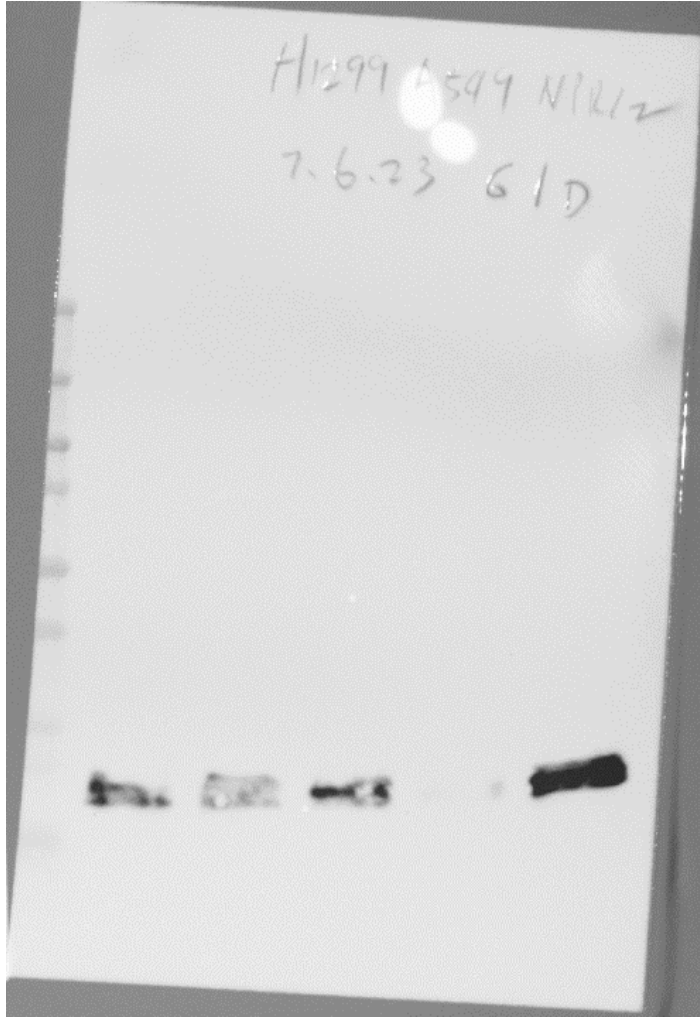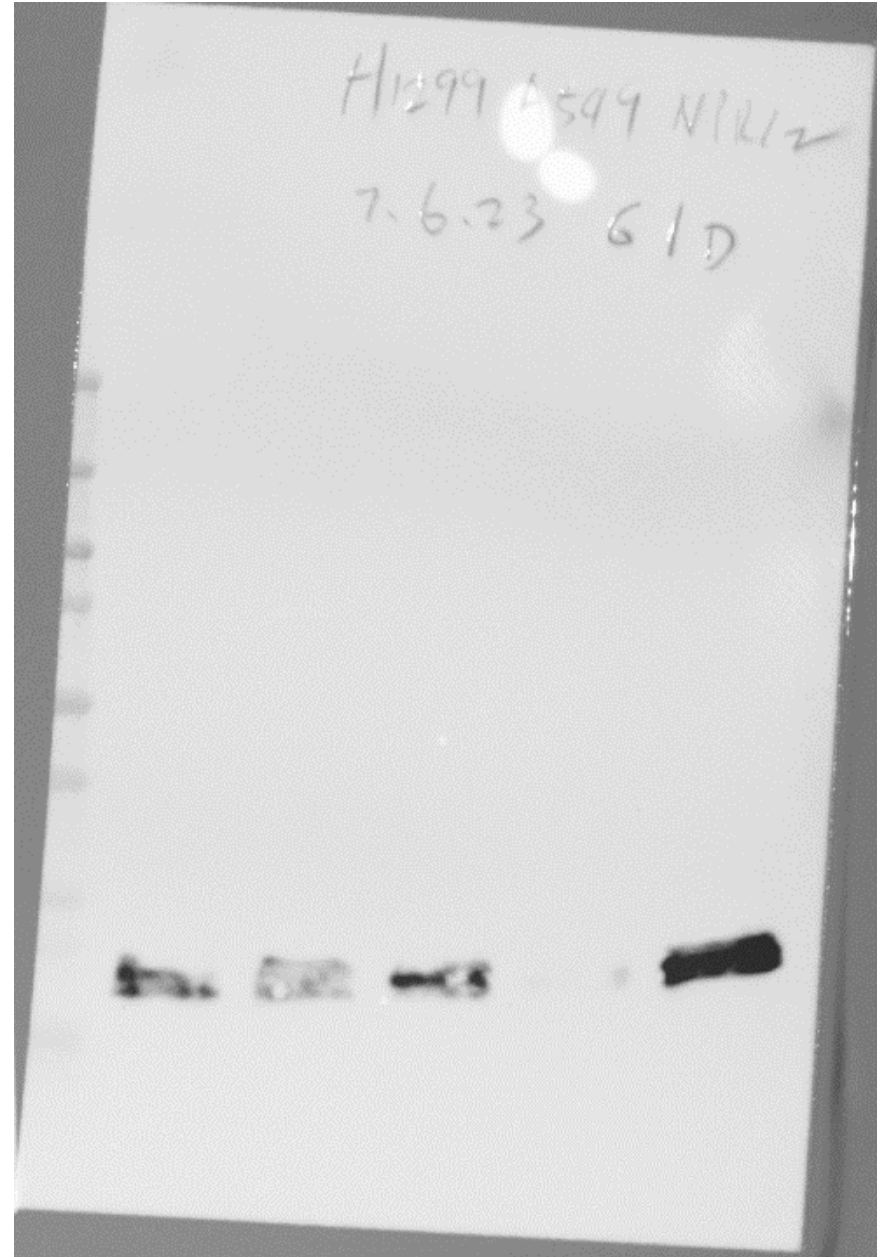

Figure 8-source data 1: PDF file containing original western blots for Figure 8S, indicating the relevant bands and samples

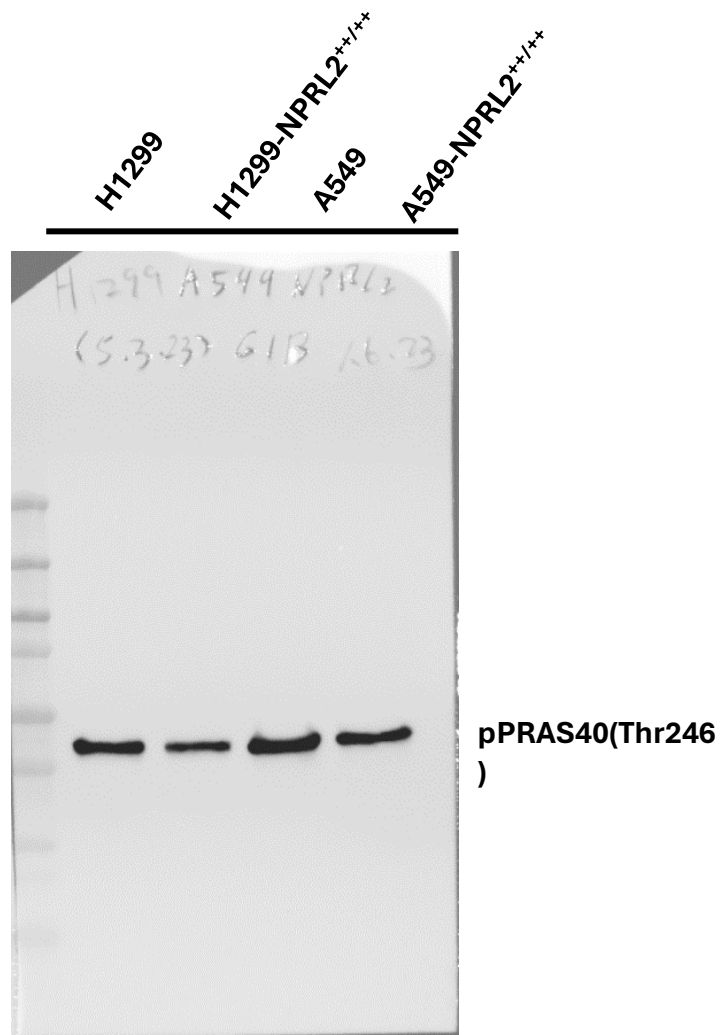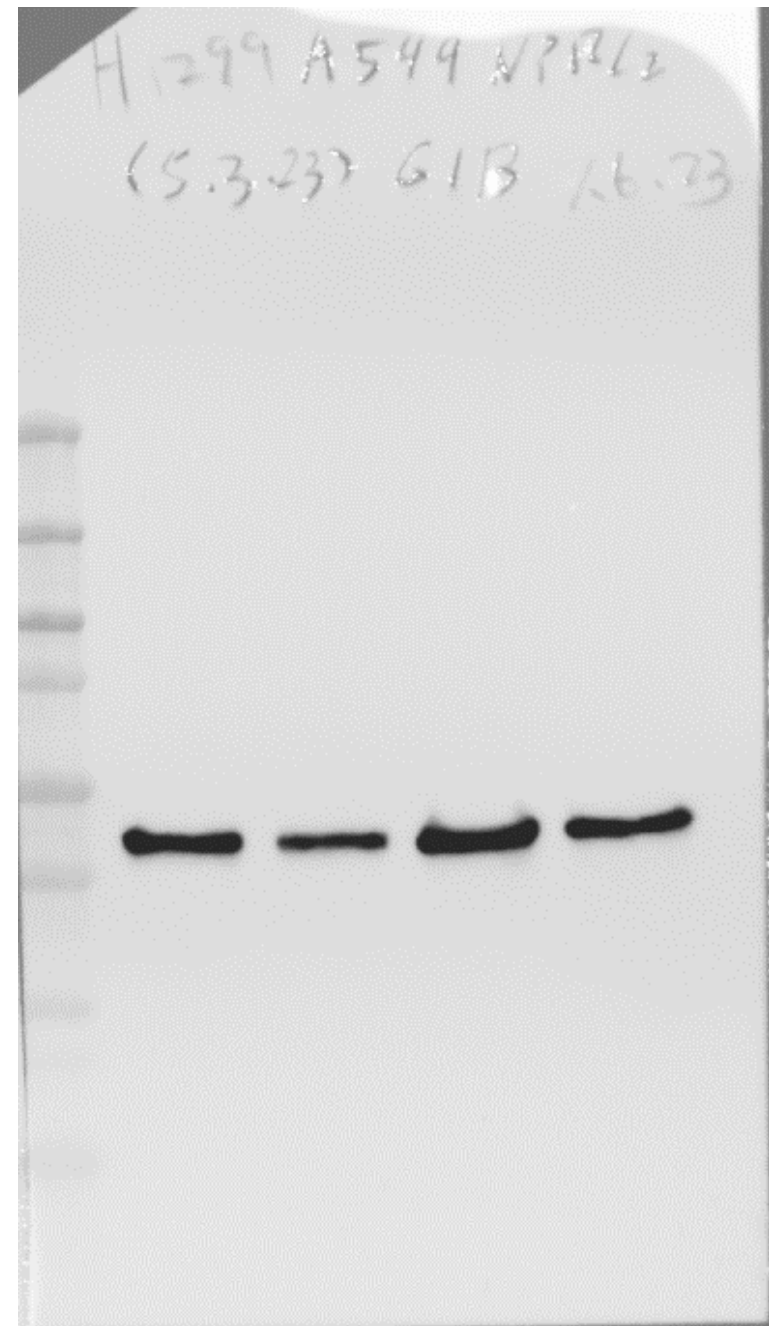

Figure 8-source data 1: PDF file containing original western blots for Figure 8S, indicating the relevant bands and samples

H1299  
H1299-NPRL2<sup>+/+</sup>  
A549  
A549-NPRL2<sup>+/+</sup>

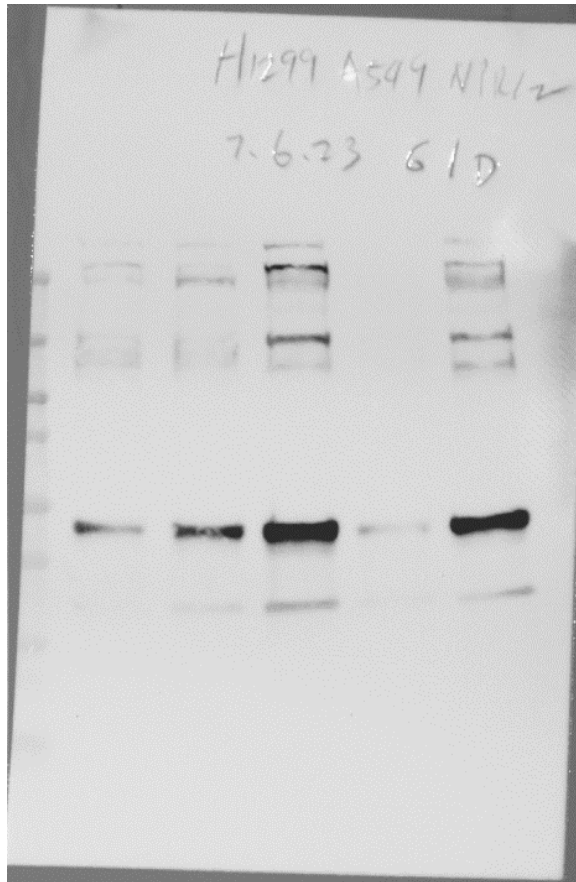

pGSK-3b

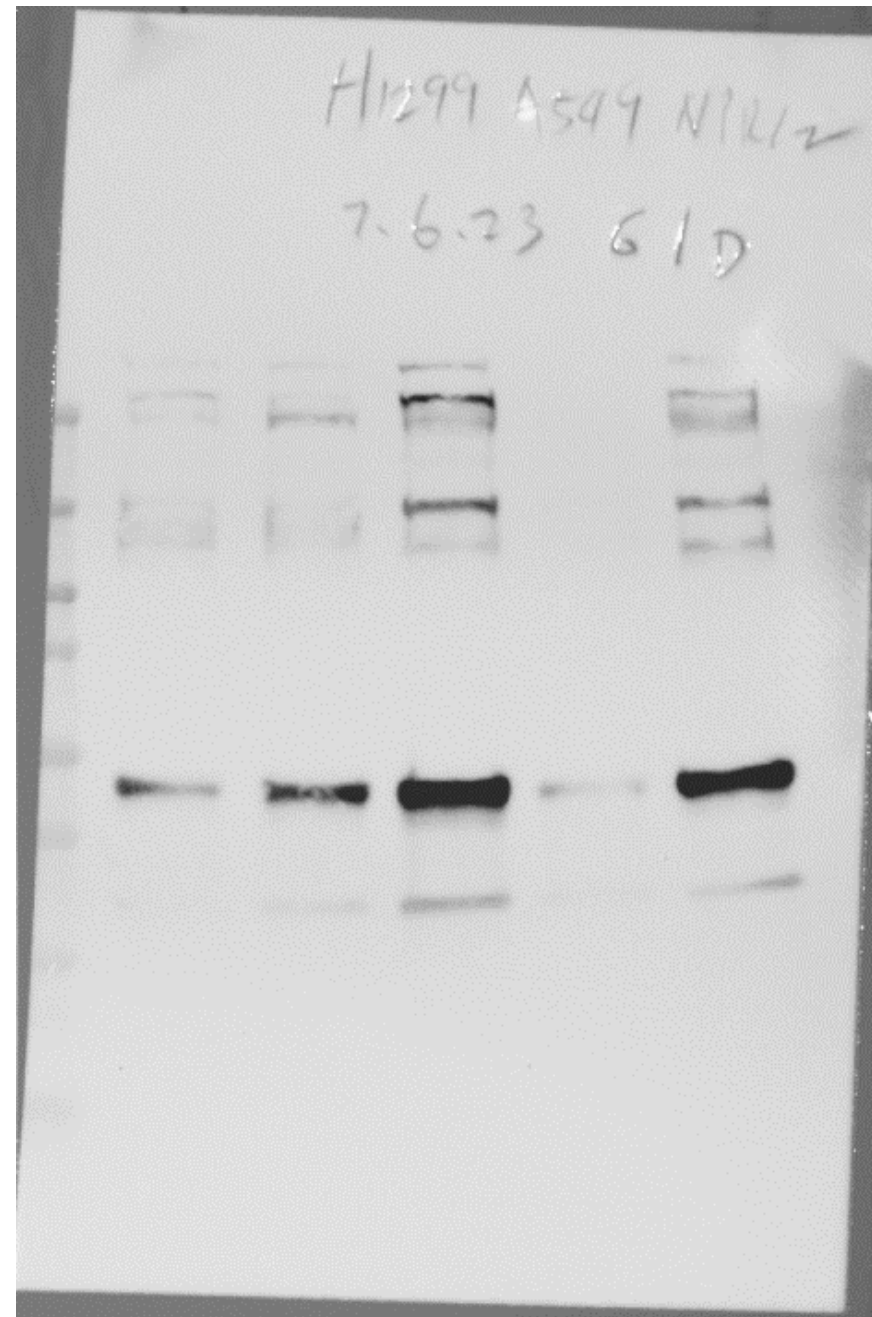

Figure 8-source data 1: PDF file containing original western blots for Figure 8S, indicating the relevant bands and samples

H1299  
H1299-NPRL2<sup>+/+</sup>  
A549  
A549-NPRL2<sup>+/+</sup>

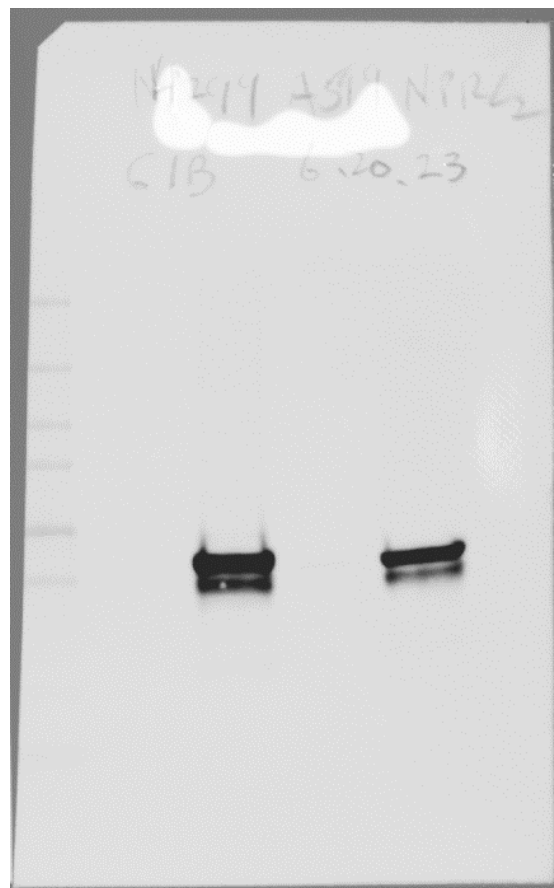

NPRL2

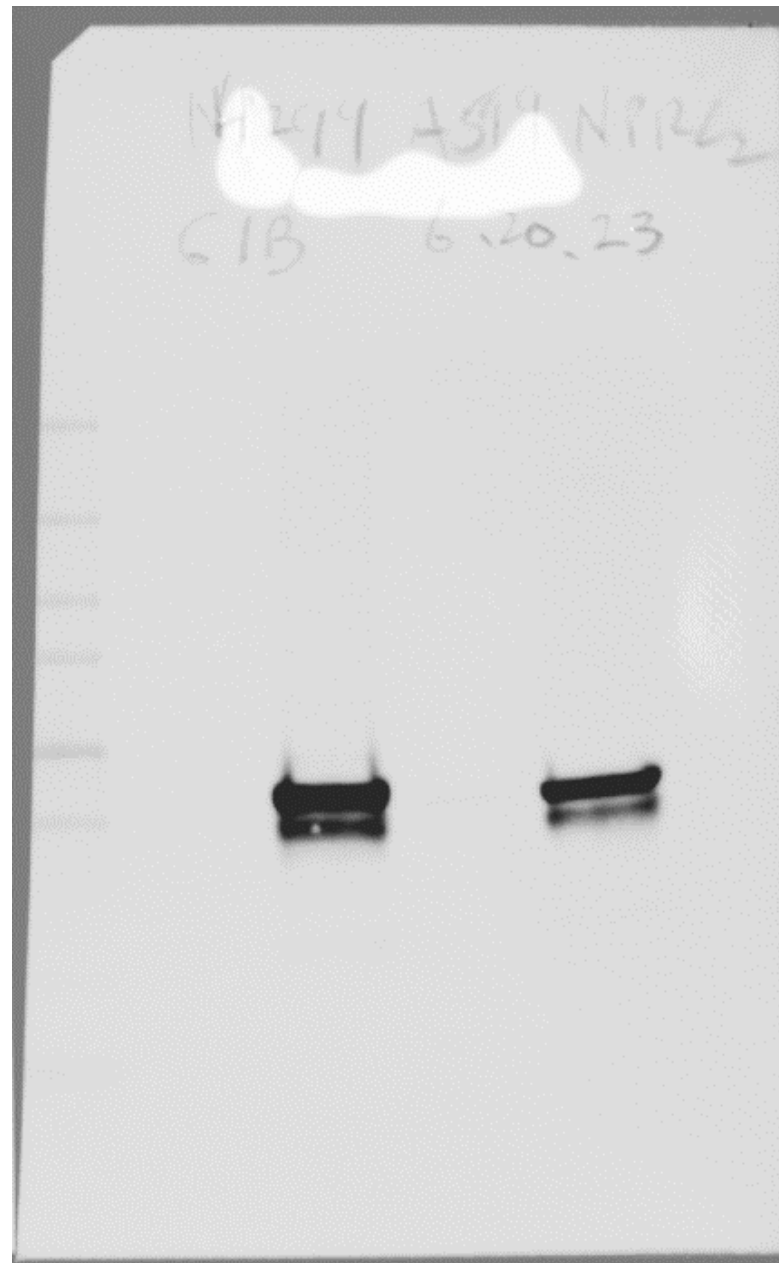

Figure 8-source data 1: PDF file containing original western blots for Figure 8S, indicating the relevant bands and samples

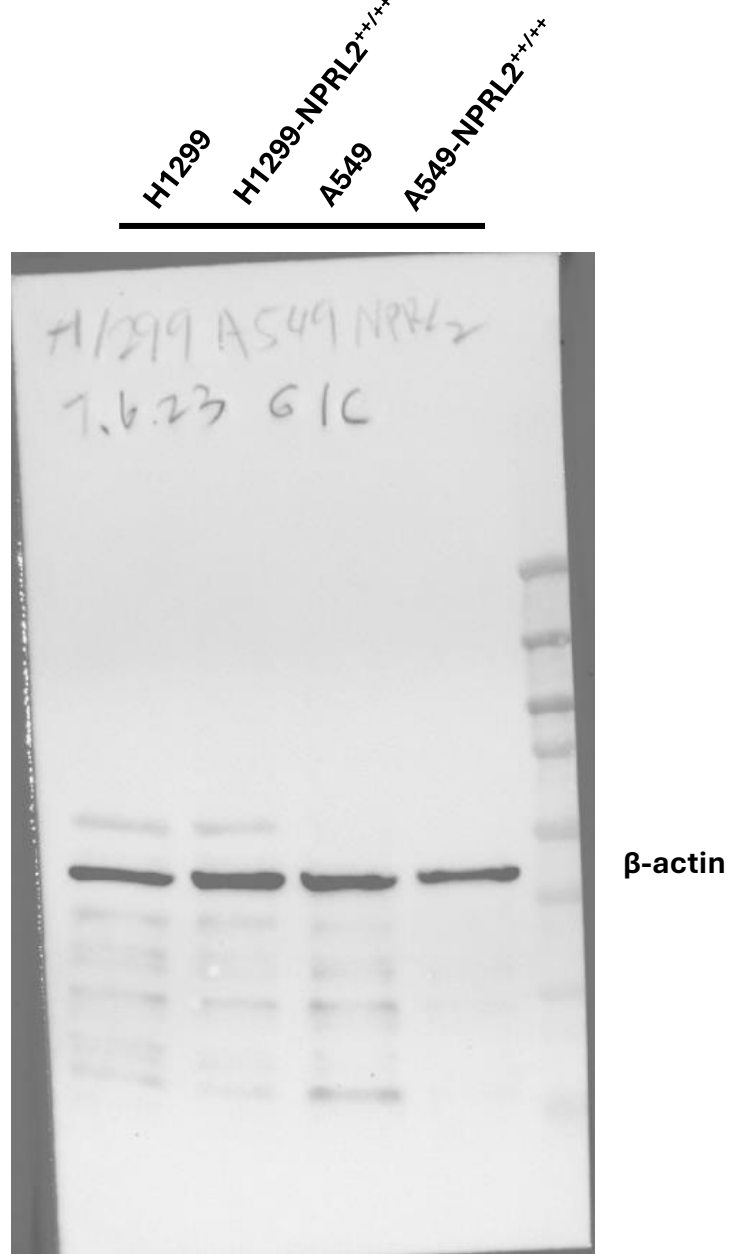

Figure 8-source data 1: PDF file containing original western blots for Figure 8S, indicating the relevant bands and samples
