# Supplementary material for: NPRL2 gene therapy induces effective antitumor immunity in KRAS/STK11 mutant anti-PD1 resistant metastatic non-small cell lung cancer (NSCLC) in a humanized mouse model
Source: eLife. 2025 Feb 11;13:RP98258. doi: 10.7554/eLife.98258 (PMC11813225; doi:10.7554/eLife.98258)
Supplement: Figure 1—source data 1. [file elife-98258-fig1-data1.xlsx]

## Sheet: Figure 1-source data 1
	Figure 1C: colonly formation assay
	H1299 cells
	EV				NPRL2
	6699980705	7302410344			2556504153	2348141252
	A549 cells
	EV				NPRL2
	8596227354	8741454692			7931119862	8079336254
	Figure 1E: Apoptosis assay
	H1299 cells
	Control			EV			NPRL2
	12.7	10.6	8.1	12.8	14.5	10.5	23.7	37.6	28.9
