# Supplementary material for: NPRL2 gene therapy induces effective antitumor immunity in KRAS/STK11 mutant anti-PD1 resistant metastatic non-small cell lung cancer (NSCLC) in a humanized mouse model
Source: eLife. 2025 Feb 11;13:RP98258. doi: 10.7554/eLife.98258 (PMC11813225; doi:10.7554/eLife.98258)
Supplement: Figure 2—source data 1. [file elife-98258-fig2-data1.xlsx]

## Sheet: Figure 2-source data 1
		Figure 2B: Tumor-bearing non-humanized mice were imaged by IVIS 200 and tumor intensity was measured and quantitated and level of tumor reduction by NPRL2 treatment
		Non-Humanized Mice
		Empty Vector (N=9)											NPRL2 (N=10)
	Post-treatment IVIS	783000000	666000000		224000000	520000000	441000000	332000000	454000000	238000000	663000000		461000000	28900000	258000000	128000000	461000000	264000000	9440000	14300000	514000000	310000000
		Figure 2C: Tumor intensity was measured through bioluminescence imaging and the percentage of change in tumor intensity was calculated by using pre- and post-treatment tumor intensity data
		Non-Humanized Mice
		Empty Vector										NPRL2
	% of change wk1 vs wk4	73700	3780	5960	3590	73400	31900	39100	2360	10900		13300	68.2	6900	806		15300	716	47.6	8410	3800
		Figure 2F: Tumor-bearing humanized mice were imaged by IVIS 200 and tumor intensity was measured and quantitated and the level of tumor reduction by NPRL2 treatment
		Humanized Mice
		Empty Vector (N=10)											NPRL2 (N=11)
	Post-Treat IVIS	62500000	9390000	23900000	25000000	119000000	18000000	10900000	9890000	38300000	66200000		2210000	3910000	284000	972000	1560000	10600000	697000	2240000	5530000	34600000	22500000
		Figure 2G: Tumor intensity in humanized mice was measured and the percentage of change in tumor intensity was calculated by using pre- and post-treatment tumor intensity data
		Humanized Mice
		Empty Vector											NPRL2
	% of Change	6000	654	2360	4090	9580	1390	845	840	3890	1640		115	214	-70.8	63	27.4	775	-39.5	113	476	812	335
		Figure 2H: Comparison of the antitumor activity of NPRL2 between humanized and non-humanized mouse systems based on percentage of tumor intensity change
		Humanized Mice vs Non-humanized Mice
		Non-humanized											Humanized
	% of Change	13300	68.2	6900	15300	716	47.6	8410	3800	806			115	214	-70.8	63	27.4	775	-39.5	113	476	812	335
		Figure 2I: Antitumor activity pembrolizumab, NPRL2 and its combination was determined based on tumor intensity measured through bioluminescence imaging
		Combination treatment in Humanized Mice
		Empty Vector											Pembrolizumab											NPRL2											Combination
	Post-Treat IVIS	62500000	9390000	23900000	25000000	119000000	18000000	10900000	9890000	38300000	66200000		68900000	27600000	25000000	135000000	105000000	32400000	16400000	21200000	1210000			2210000	3910000	284000	972000	1560000	13600000	697000	2240000	5530000	34600000	22500000	15200000	3780000	32500000	40900000	5680000	614000	2640000	5090000	1370000	12000000
		Figure 2K: Antitumor activity pembrolizumab, NPRL2 and its combination was determined based on tumor intensity measured through bioluminescence imaging
		Combination treatment in Humanized Mice
		Individual Mice response
		Empty Vector											Pembrolizumab											NPRL2											Combination
	Post-Treat IVIS at wk4	62500000	9390000	23900000	25000000	119000000	18000000	10900000	9890000	38300000	66200000		68900000	27600000	25000000	135000000	105000000	32400000	16400000	21200000	1210000			2210000	3910000	284000	972000	1560000	13600000	697000	2240000	5530000	34600000	22500000	15200000	3780000	32500000	40900000	5680000	614000	2640000	5090000	1370000	12000000
