# Supplementary material for: NPRL2 gene therapy induces effective antitumor immunity in KRAS/STK11 mutant anti-PD1 resistant metastatic non-small cell lung cancer (NSCLC) in a humanized mouse model
Source: eLife. 2025 Feb 11;13:RP98258. doi: 10.7554/eLife.98258 (PMC11813225; doi:10.7554/eLife.98258)
Supplement: Figure 3—source data 1. [file elife-98258-fig3-data1.xlsx]

## Sheet: Figure 3-source data 1
		Figure 3: NPRL2 induces antitumor immune responses in anti-PD1 resistant KRAS/LKB1 mutant A549-Lung Met in humanized mice
		Tumor Immune Microenvironment analysis in Humanized mice
		Figure 3A: huCD45 in TME
		Control						Pembrolizumab						NPRL2						Combination
	CD45 in TME	53.7	51.4	31.1	41.4	35		39	47.7	32.2	33.8	62.2		74.8	79.4	48.7	72.2	63.2		78	67.8	64.9	62.2	46.9	70.6
		Figure 3B: HuCD3 T in TME
		Control						Pembrolizumab						NPRL2						Combination
	CD3 in TME	8.51	8.3	12.7	4.18	11.2		14.3	10.88	29.5	12.14	19.9		41.2	32.8	22.2	30	42.6		28.5	33.5	27.14	21.6	16	25.8
		Figure 3C: HuCD8 T in TME
		Control						Pembrolizumab						NPRL2						Combination
	CD8 T in TME	15.2	21.8	26	8.16	7.36		50.5	28.57	30.3	26.6	56.8		64.9	40.1	37.5	56.6	26.5		22.2	35.9		56.4	45.8	30.5
		Figure 3D: Treg in TME
		Control						Pembrolizumab						NPRL2						Combination
	Treg in TME	16.67	16	8.88	13.3	17.3		8.36	12.1	3.45	15.1	4.56		3.18	4.47	3.61	10	0		7.62	1.87	9.46	3.57		4.37
		Figure 3E: NK in TME
		Control						Pembrolizumab						NPRL2						Combination
	NK in TME	6.58	6.29	4.11	4.51	3.35		8.36	10.4	9.52	4.87	11.2		11.4	9.04	10.5	15.3	13.1			20.3	16.77	7.19	11.8	8.24
		Figure 3F: CD69+CD8 T in TME
		Control						Pembrolizumab						NPRL2						Combination
	CD69+ CD8 T in TME	12.8	24.5	29.3	24	28.3		35.7	38.1	35.8	32.7	39.7		42.3	41.7	28.2	40.2	53.7		41.9	44.4	28.9	54.7	38.2	47.3
		Figure 3G: PD1+CD8 T in TME
		Control						Pembrolizumab						NPRL2						Combination
	PD1+ CD8 T cells in TME	14.4	20.4	11.9	16.7	20.5		3.31	1.92	1.23	0.74	3.27		12.7	3.54	17.8	12.2	9.75		7.99	1.62	3.77	8.87	1.57	5.49
		Figure 3H: CD8+ve Effector Memory in TME
		Control						Pembrolizumab						NPRL2						Combination
	EM CD8 T in TME	2.23	10.57	1.94	4.69	6.37		13.21	25.6	17.4	12.8	26.4		25.2	77.6	50	57.8	30.3		37.4	30.6	13.2	51.5	70.3
		Figure 3I: CD8+ve Central Memory in TME
		Control						Pembrolizumab						NPRL2						Combination
	CM CD8+ T in TME	20	23	24.1	32.9	15.4		23.7	75.9	17.4	81.9	18.5		64.1	64.9	86.6	69.6	25.4		69.3	62.6	33.3	84.4	45.5	79
		Figure 3J: CD103+CD8 T in TME
		Control						Pembrolizumab						NPRL2						Combination
	CD103+ CD8 T in TME	2.77	4.78	5.03	4.81	5.07		6.29	14.9	10.9	4.8	7.01		7.86	26.2	13.5	19	24		10.4	15.9	6.36	13.7	12.1
		Figure 3K: HLADR+ve DC in TME
		Control						Pembro						NPRL2						Comb
	HLA-DR+ DC	24.1	18.3	22.7	26.1	14.8		46.1	45.4	31.5	65.4	70		65.6	62.1	53.9	33.3	43.2		66.1	80.7	40.3	35.4	54.1
		Figure 3L: CD33+ve MDSC in TME
		Control						Pembro						NPRL2						Comb
	MDSC	15.3	19.2	23.2	13.4	20.4		9.11	3.22	11	14.7	7.22		5.5	3.7	2.09	1.75	9.03		1.71	7.32	4.56	6.87	12.6
		Figure 3M: M1 in TME
		Control						Pembro						NPRL2						Comb
	HLADR+CD163-ve M1	18.4	15.9	21.4	17.9			40.7	39.9	26.6	60.2	54.6		50.8	45.8	27.3	35.6	39.4		46.6	74.2	32.1	31.1	39.4
