# Supplementary material for: NPRL2 gene therapy induces effective antitumor immunity in KRAS/STK11 mutant anti-PD1 resistant metastatic non-small cell lung cancer (NSCLC) in a humanized mouse model
Source: eLife. 2025 Feb 11;13:RP98258. doi: 10.7554/eLife.98258 (PMC11813225; doi:10.7554/eLife.98258)
Supplement: Figure 4—source data 1. [file elife-98258-fig4-data1.xlsx]

## Sheet: Figure 4-source data 1
		Figure 4C: At the end of the experiment, the humanization level was checked based on the number of human CD45 cells in the mouse
		Control						Pembro						NPRL2						Combination
	CD45	61.9	74.6	75.1	46.4			74.5	78.9	77	74.2			80	68.3	68.8	76.8	65		86.1	74.8	59.7	69.8	66.6
		Figure 4D: H1299 tumors were treated with NPRL2 and pembrolizumab and tumor volume was measured twice a week. The tumor growth curve was generated based on tumor volumes and the antitumor effect was evaluated
		Control (N=5)					NPRL2 (N=5)					Pembro (N=5)					Combination (N=5)
	D41	677.606	450	317.504	898.438	800.807	718.673	1052.68	428.688	541.059	635.25	415.292	745.736	456.337	753.825	344.25	499.849	535.755	396.94	638.45	746.051
	D44	1284.85	942.69	502.944	1653.07	1257.73	1046.82	1065.02	577.368	1220.74	599.99	503.928	961.792	1005.55	751.896	468.18	671.104	683.816	540.586	814.928	820.8
	D48	1419.48	1404.13	845.68	2710.84	1596.07	1423.61	1184.62	818.64	1416.45	1128.81	1016.76	1550.47	1023.42	1636.4	1517.82	781.25	1078	635.25	663.917	750.533
	D52	2046.87	1960.2		3484.89	2222.32	1681.75	1471.75	1140.21	1681.75	1608.75	1597.5	1902.69	1596.07	1524.09	1443.07	914.76	1225	912.87	799.2	1043.65
	D55	2750.38	2373.44		4199.04	2994.69	2069.1	1920	1440.21	2167.5	2108.03	1764.36	2207.7	2069.1	2272.03	2434.69	1127	1539.07	885.047	921.05	1329.18
		Figure 4E: Growth curves showed the individual mouse response to treatment
		Control (N=5)
	D41	677.606	450	317.504	898.438	800.807
	D44	1284.85	942.69	502.944	1653.07	1257.73
	D48	1419.48	1404.13	845.68	2710.84	1596.07
	D52	2046.87	1960.2		3484.89	2222.32
	D55	2750.38	2373.44		4199.04	2994.69
		NPRL2 (N=5)
	D41	718.673	1052.68	428.688	541.059	635.25
	D44	1046.82	1065.02	577.368	1220.74	599.99
	D48	1423.61	1184.62	818.64	1416.45	1128.81
	D52	1681.75	1471.75	1140.21	1681.75	1608.75
	D55	2069.1	1920	1440.21	2167.5	2108.03
	Pembro (N=5)
D41	415.292	745.736	456.337	753.825	344.25
D44	503.928	961.792	1005.55	751.896	468.18
D48	1016.76	1550.47	1023.42	1636.4	1517.82
D52	1597.5	1902.69	1596.07	1524.09	1443.07
D55	1764.36	2207.7	2069.1	2272.03	2434.69
		Combination (N=5)
	D41	499.849	535.755	396.94	638.45	746.051
	D44	671.104	683.816	540.586	814.928	820.8
	D48	781.25	1078	635.25	663.917	750.533
	D52	914.76	1225	912.87	799.2	1043.65
	D55	1127	1539.07	885.047	921.05	1329.18
		Figure 4F: CD8 T in the TME in H1299 tumors in humanized mice
		Control						Pembro						NPRL2						Combination
	CD8 T	11.7	13.5	2.84	3.11			17.9	5.93	17.5	32.5	13.5		27	27	19.1	18.87	10.3		18.3	26.4	30.1	13.45	11.3
		Figure 4G: NK in the TME in H1299 tumors in humanized mice
		Control						Pembro						NPRL2						Combination
	NK	22.9	9.15	15.3	12.2			33.2	18.7	20.5	27.9	23.2		21	36.2	33.7	31.1	31.5		37.1	18.8	24.2	24.8	41.6
		Figure 4H: HLA-DR+DC in the TME in H1299 tumors in humanized mice
		Control						Pembro						NPRL2						Combination
	HLA-DR+ DC	41	30.4	35.6	40.3			48.2	43.2	47.3	45.4			47.8	44.7	52	55.4	56.2		44.4	48.7	48.2	52.7	60.1
		Figure 4I: CD69+CD8+ T in the TME in H1299 tumors in humanized mice
		Control						Pembro						NPRL2						Combination
	CD8 T CD69	0.51	1.23	2.63	1			9.63	15.4	8.99	4.27			2.91	4.78	13.5	4.45	2.64		8.6	6.21	14.9	6.62	3.36
		Figure 4J: PD1+CD8+ T in the TME in H1299 tumors in humanized mice
		Control						Pembro						NPRL2						Combination
	CD8 T PD1+	20.6	27	13.9	19.18			8.93	9.4	5.62	6.26			10.2	10.6	9.25	10.2	9.88		7.91	4.35	11.9	6.62	13.2
		Figure 4K:CD103+CD8+ T in the TME in H1299 tumors in humanized mice
		Control						Pembro						NPRL2						Combination
	CD8 T CD103+	4.41	3.99	5.3	3.55			5.18	12.1	13.5	15.6			6.08	3.9	4.26	9.1	5.48		8	9.32	16.4	15.5	6.03
