# Supplementary material for: NPRL2 gene therapy induces effective antitumor immunity in KRAS/STK11 mutant anti-PD1 resistant metastatic non-small cell lung cancer (NSCLC) in a humanized mouse model
Source: eLife. 2025 Feb 11;13:RP98258. doi: 10.7554/eLife.98258 (PMC11813225; doi:10.7554/eLife.98258)
Supplement: Figure 5—source data 1. [file elife-98258-fig5-data1.xlsx]

## Sheet: Figure 5-source data 1
		Figure 5. Antitumor effect of NPRL2 on anti-PD1 resistant LLC2 tumors in a syngeneic mouse model
		Figure 5B: The antitumor effect of NPRL2, anti-PD1, and its combinations based on their tumor volume changes for four weeks
		Control (N=9)										aPD1 (N=9)										NPRL2 (N=9)										NPRL2+aPD1 (N=9)
	D10		45.5625	21.4375	32	45.5625	13.5	33.1533	32	45.5625	32	21.4375	32	32	48.668	28	16.9884	24		13.5	18.375	44.2463	49.996	15.3659	26.0876	41.6081	36.6003	35.4465	65.6425	95.381	44.7525	125	44.6797	60.125	36.8676	41.1264			45.4247	66.0425	40.0686
	D14		163.125	45.494	61.1235	173.915	38.829	55	58.136	113.256	68.8205	69.8535	73.034	61.236	81	130.928	40.656	100.188		51.84	36.162	74.727	34.398	22.382	113.117		60.3935	63.525	87.464	186.184	61.25	150.59	55.223	56.18	33.62	95.4			60	129.024	53.371
	D17		231.2	100.188	122.525	338.724	109.147	116.188	103.513	121.406	133.308	179.2	82.8495	102.6	194.398	355.348	79.968	122.5		64.896	45.494	86.0985		54.144	122.525		75.69	67.28	146.189	260.1	64.896	246.037	55.296	158.792	44.436	217.6			124.638	270.938	182.812
	D21		777.924	278.784	450	968.75	380.88	355.488	335.768	425.736	388.784	706.99	169.756	279.005	519.168	898.438	197.73	234.812		183.446	99	220.8		200.772	299.837		143.344	193.471	292.142	460	180.834	484.548	159.25	259.159	137.214	488.988			248.788	551.25	270.938
	D24		1524.31	605	534.712	1534.75	530.604	639.744	568.7	1053.4	641.574	1349.63	404.587	674.475	891.808	2105.35	416.416	438.204		368.505	243.2	324.761		133.088	475		223.893	328.879	389.205	761	225.792	869.918	256	364.5	275.684	878.46			510.05	878.46	468.562
	D27		2191.61	1330.82	1132.56	2913.54	1185.1	1417.51	1502.78	1562.82	1732.8	2328.48	861.001	1111.72	1410.05	3021.91	745.736	881.25		795.84	406.125	376.36		310.329	1098.5		207.936	891.648	677.655	1422.37	520.576	1584.67	279.005	475	714.78	1471.75			849.178	1503.29	720
		Figure 5C: Individual mouse growth curves showed the individual mouse response upon treatments
		Control (N=9)
			45.5625	21.4375	32	45.5625	13.5	33.1533	32	45.5625	32
			163.125	45.494	61.1235	173.915	38.829	55	58.136	113.256	68.8205
			231.2	100.188	122.525	338.724	109.147	116.188	103.513	121.406	133.308
			777.924	278.784	450	968.75	380.88	355.488	335.768	425.736	388.784
			1524.31	605	534.712	1534.75	530.604	639.744	568.7	1053.4	641.574
			2191.61	1330.82	1132.56	2913.54	1185.1	1417.51	1502.78	1562.82	1732.8
		aPD1 (N=9)
		21.4375	32	32	48.668	28	16.9884	24		13.5	18.375
		69.8535	73.034	61.236	81	130.928	40.656	100.188		51.84	36.162
		179.2	82.8495	102.6	194.398	355.348	79.968	122.5		64.896	45.494
		706.99	169.756	279.005	519.168	898.438	197.73	234.812		183.446	99
		1349.63	404.587	674.475	891.808	2105.35	416.416	438.204		368.505	243.2
		2328.48	861.001	1111.72	1410.05	3021.91	745.736	881.25		795.84	406.125
		NPRL2 (N=9)
		44.2463	49.996	15.3659	26.0876	41.6081	36.6003	35.4465	65.6425	95.381	44.7525
		74.727	34.398	22.382	113.117		60.3935	63.525	87.464	186.184	61.25
		86.0985		54.144	122.525		75.69	67.28	146.189	260.1	64.896
		220.8		200.772	299.837		143.344	193.471	292.142	460	180.834
		324.761		133.088	475		223.893	328.879	389.205	761	225.792
		376.36		310.329	1098.5		207.936	891.648	677.655	1422.37	520.576
		NPRL2+aPD1 (N=9)
		125	44.6797	60.125	36.8676	41.1264			45.4247	66.0425	40.0686
		150.59	55.223	56.18	33.62	95.4			60	129.024	53.371
		246.037	55.296	158.792	44.436	217.6			124.638	270.938	182.812
		484.548	159.25	259.159	137.214	488.988			248.788	551.25	270.938
		869.918	256	364.5	275.684	878.46			510.05	878.46	468.562
		1584.67	279.005	475	714.78	1471.75			849.178	1503.29	720
		Figure 5D: CD45 in the TME in LLC2 syngeneic tumors
		Control				aPD1				NPRL2				NPRL2+aPD1
	CD45	83.8	70.1	59.3		59.7	78	67.8		78.1	75.2			77.1	92.6
		Figure 5E: T cells in the TME in LLC2 syngeneic tumors
		Control				aPD1				NPRL2				NPRL2+aPD1
	CD3+ T	17	7.77	4.06		4.98	7.31	6.88		29.8	19.2			17.75	45.9
	CD4+ T	21.5	23.8	14.2		21	26.2	20.4		43.6	43			44	57.5
	CD8+ T	23.5	26.7	20.9		28.4	39.3	35.9		44.8	41.5			38.4	36.5
		Figure 5F: Treg in the TME in LLC2 syngeneic tumors
		Control				aPD1				NPRL2				NPRL2+aPD1
	Treg	18.7	22.3	18.16		12.6	19	3.82		13.6	10.7			13.4	7.46
		Figure 5G: NK cells in the TME in LLC2 syngeneic tumors
		Control				aPD1				NPRL2				NPRL2+aPD1
	NK	13.6	14	17.1		13.7	13.2	12.6		26.9	22.8			17.7	17.8
		Figure 5H: PD1 expressing T cells in the TME in LLC2 syngeneic tumors
		Control				aPD1				NPRL2				NPRL2+aPD1
	CD3+T PD1+	68.3	57.2	62.6		70.9	44.8	47.9		17.7	21.8			11.5	14.2
	CD4+T PD1+	34.4	26.6	53.1		43.3	21.3	15.3		13.1	14.5			5.27	11.5
	CD8+T PD1+	45	41.3	41.7		58.7	38.7	24.8		7.88	9.05			6.09	9.8	7.8
		Figure 5I: CD11C+ve DC in the TME in LLC2 syngeneic tumors
		Control				aPD1				NPRL2				NPRL2+aPD1
	CD11c DC	11.4	16	12.5		15.7	19.6	6.7		29.8	20	24.5		19.77	23.6
		Figure 5J: MDSC in the TME in LLC2 syngeneic tumors
		Control				aPD1				NPRL2				NPRL2+aPD1
	MDSC	43.7	48.6	58.4		32.5	35.6	32.8		41.2	45.7			29.5	33.3
		Figure 5K: Myeloid cells in the TME in LLC2 syngeneic tumors
		Control				aPD1				NPRL2				NPRL2+aPD1
	Lin-ve	58.2	79.2	83.3		82.6	74.1	75.1		36.8	47.2	33.1		65.5	29.1	38.2
		Figure 5L: MHCII+ve DC in the TME in LLC2 syngeneic tumors
		Control				aPD1				NPRL2				NPRL2+aPD1
	MHC II+ve DC	15.2	15.9	14.2		13.5	22	23.2		26.7	29.7				31.1	21
		Figure 5M: Expression of DC maturation markers in the TME in LLC2 syngeneic tumors
		Control				aPD1				NPRL2				NPRL2+aPD1
	MHCII+ve	56.3	51.9	41.9		41.3	58.7	57.9		45.1	63.7			37.6	53.1
	CD86+ve	12.5	13.9	10.3		12.8	12.2	5.26		17.5	30.5			17.1	21.8
	CD40+ve	11.8	14.1	3.62		12	23.6	3.51		19.9	17.3			16.4	17.7
