# Supplementary material for: NPRL2 gene therapy induces effective antitumor immunity in KRAS/STK11 mutant anti-PD1 resistant metastatic non-small cell lung cancer (NSCLC) in a humanized mouse model
Source: eLife. 2025 Feb 11;13:RP98258. doi: 10.7554/eLife.98258 (PMC11813225; doi:10.7554/eLife.98258)
Supplement: Figure 6—source data 1. [file elife-98258-fig6-data1.xlsx]

## Sheet: Figure 6-source data
		Figure 6: Antitumor effect of NPRL2 on anti-PD1 resistant LLC2 tumors in immune cells depleted syngeneic mice
		Figure 6B: Effect of NPRL2 on anti-PD1 resistant LLC2 tumors
		Control						NPRL2
	D8	77.2475	19.652	38.829	32	45.5625		40	48.6	25.3265	45.9375	40	36.288
	D13	276.822	48.074	173.4	75.712	118.098		114.464	151.838	80.0565	254.016	104.04	183.787
	D16	863.821	190.44	611.104	172.062	417.874		359.856	269.568	169.884	473.984	275.625	235.2
	D20	1004.67	380.926	1125.3	363.384	981.198		627.328	492.993	295.245	566.636	451.315	484.344
	D23	1321.31	520	1333.08	1149.98	2725.89		661.5	636.54	428.688	528.22	726	661.5
		Figure 6C: Effect of NPRL2 on LLC2 tumors in CD4 T cells depleted mice
		Control (CD4 dep)						NPRL2 (CD4 Dep)
	D8	40.678	93.75	21.4375	27.38	25.3265		62.5	39.7535	54.208	34.4605	16.384	74.4385
	D13	128.797	555.955	134.946	158.438	78.0325		155.648	70	106.171	95.8455	177.071	209.952
	D16	324.769	827.544	404.942	195.272	326.7		250.312	192.512	437.536	190.782	282.014	514.425
	D20		1352.12	1101.56	467.877	903.96		590	472.384	556.614	488.579	1065.19	917.163
	D23		1800	1372	689.062	978.65		506.88	847	864	734.217	1538.94	1106.95
		Figure 6D: Effect of NPRL2 on LLC2 tumors in CD8 T cells depleted mice
		Control (CD8 Dep)						NPRL2 (CD8 Dep)
	D8	40.678	37.926	122.304	13.5	36.75		28.88	40	58.212	37.044	32	22.05
	D13	89.376	138.915	122.304	133.12	169.884		112.694	127.832	265.243	198.45	114.464	113.132
	D16	251.982	231.231	632.462	141.398	605		253.125	279.864	618.52	330.672	235.468	185.9
	D20	490.912	451.25	932.137	565	1524.1		419.05	278.438	1274.19	738.675		516.906
	D23	689.062	633.938	1203.05	620.626	1633.28		899.3	625	2030.11	847		631.236
		Figure 6E: Effect of NPRL2 on LLC2 tumors in NK cells depleted mice
		Control (NK dep)						NPRL2 (NK dep)
	D8	49.726	40	52.92	45.5625			32	32	46.575	32	32	19.652
	D13	177.45	72.111	175.616	387.2			78.03	94.9365	119.168	150.822	183.787	106.25
	D16	364.135	190.8	316.224	697.632			147.456	242.76	458.397	316.368	401.157	238.136
	D20	674.16	648	744.673	1262.14			418.176	911.754	747.194	548.352	316.028	657.965
	D23	914.4	1630.85	1370.96	1593.98			560	777.728	1372	864	469.3	772.524
		Figure 6F: Effect of NPRL2 on LLC2 tumors in Macrophages (MQ) depleted mice
		Control (MQ dep)						NPRL2 (MQ dep)
	D8	32	41.6025	66.25				52.92	27.436	32	32	61.364	41.6025
	D13	113.4	78.0325	211.42				131.4	57.132	123.576	99.238	284.062	148.104
	D16	156.325	172.032	334.036				308.308	147.6	356.372	163.35	563.558	376.544
	D20	316.028	573.359	526.5				1246.27	403.007	455.175	351.339		576
	D23	721.28	721.448	877.25				1462.1	537.464	609.188	505.966		621.92
