# Supplementary material for: NPRL2 gene therapy induces effective antitumor immunity in KRAS/STK11 mutant anti-PD1 resistant metastatic non-small cell lung cancer (NSCLC) in a humanized mouse model
Source: eLife. 2025 Feb 11;13:RP98258. doi: 10.7554/eLife.98258 (PMC11813225; doi:10.7554/eLife.98258)
Supplement: Figure 8—figure supplement 1—source data 1. [file elife-98258-fig8-figsupp1-data1.xlsx]

## Sheet: Figure 8-figure supplement 1
	Figure 8-figure supplement: Stable expression NPRL2 affected the cell cycle.
		H1299				H1299-NPRL2++/++
	G1	47.1	50.5	55.2		35.7	40.3	45.1
		H1299				H1299-NPRL2++/++
	S phase	13.3	12.6	11.1		17	15.4	15.1
		H1299				H1299-NPRL2++/++
	G2/M	29	30.1	26.1		33.5	41.2	36.4
