# Supplementary material for: NPRL2 gene therapy induces effective antitumor immunity in KRAS/STK11 mutant anti-PD1 resistant metastatic non-small cell lung cancer (NSCLC) in a humanized mouse model
Source: eLife. 2025 Feb 11;13:RP98258. doi: 10.7554/eLife.98258 (PMC11813225; doi:10.7554/eLife.98258)
Supplement: Figure 8—source data 1. [file elife-98258-fig8-data1.xlsx]

## Sheet: Figure 8-source data 1
		Figure 8: Restoration of NPRL2 expression altered TME, induced apoptosis, inhibited cell growth and signaling
		Figure 8C: Tumor growth curves
		H1299 Cont (N=10)												H1299-NPRL2 (N=5)
	D28	256	196	266.805	256	208.25	213.16	210.938	194.4	225	256			150.381	94.08	178.956	272	166.635
	D31	419.476	580	439.615	493.056	499.408	472.726	411.825	393.762	525.312	474.624			376.65	268.8	368.55	454.072	230.688
	D35	496.375	744.185	689.062	744.15	913.385	566.784	635.904	734.832	713.486	740.602			487.142	334.116	488.448	625.931	393.762
	D37	1129.03	952.2	572.22	991.27	1323.56	1140.75	924.075	1085.94	1044	972			477.9	431.664	655.987	833.175	576.24
	D39	1412.44	1610.36	1262.44	1210.94	1421.49	1259.05	1385.1	1233.7	1220.61	1225.25			738.1	635.419	806.725	1031.25	881.368
	D43	1548.4	1828.98	535	1640.18	1629.44	1600.42	1675.8	1494.95	2095.11	1603.64			941.707	683.55	936	1201.27	1096.85
		Figure 8D: TME analysis in humanized mice-huCD45
			H1299 TME						H1299-NPRL2 TME
		CD45 in TME	58.7	50.8	64.2	63.7			69.3	60.9	70.9	64.3	61.6
		Figure 8E: TME analysis in humanized mice-huCD19
			H1299 TME						H1299-NPRL2 TME
		CD19 B in TME	55.7	36.3	46	59.7			24.5	22.3	18.5	32.4	23.6
		Figure 8F: TME analysis in humanized mice-huCD3 T
			H1299 TME						H1299-NPRL2 TME
		CD3 T in TME	5.5	6.58	10.6	11			10.5	13.2	16.8	21.9	18.6
		Figure 8G: TME analysis in humanized mice-huCD4 & CD8 T
			H1299 TME						H1299-NPRL2 TME
		CD8	31.5	23.5	15.4	21.5			31.2	18.2	41.5	28.4	45.8
		CD4	5.79	4.07	8.23	7.23			2.57	2.75	1.63	3.63	3.77
		Figure 8H: TME analysis in humanized mice-huNK
			H1299 TME						H1299-NPRL2 TME
		NK in TME	2.65	10.7	2.57	7.61			2.49	3.06	5.57	6.7	2.46
		Figure 8I: TME analysis in humanized mice-Treg
			H1299 TME						H1299-NPRL2 TME
		Treg in TME	14.7	18.5	26.5	34			14.7	5.08	0	5.88	0
		Figure 8J: TME analysis in humanized mice-PD1+CD3+ T
			H1299 TME						H1299-NPRL2 TME
		PD1+CD3+ T in TME	16.7	14.8	28.6	16.5			11.5	9.54	10.8	9.3	10.5
		Figure 8K: TME analysis in humanized mice-CD69+CD3+ T
			H1299 TME						H1299-NPRL2 TME
		CD69+CD3+ T in TME	8.35	4.94	4.8	7.85			6.21	4.79	5.93	3.2	5.3
		Figure 8L: TME analysis in humanized mice-MDSC
			H1299 TME						H1299-NPRL2 TME
		MDSC in TME	14.4	14.2	13.1	11.4			7.09	9.09	7.05	8.15	7.48
		Figure 8M: TME analysis in humanized mice-TAM
			H1299 TME						H1299-NPRL2 TME
		CD163+TAM in TME	6.16	4.26	5.59	4.55			1.66	3.02	3.08	2.58	1.55
		Figure 8N: TME analysis in humanized mice-DC
			H1299 TME						H1299-NPRL2 TME
		DC in TME	5.04	13.6	8.01	10.3			17.1	20	22.1	17.1	12.9
